# Supplementary material
Source: PubMed Central journal article supplement (PMC6652154)

## Supplementary Online Content

Johnston KC, Bruno A, Pauls Q, et al; for the Neurological Emergencies Treatment Trials Network and the SHINE Trial Investigators. Intensive vs standard treatment of hyperglycemia and functional outcome in patients with acute ischemic stroke: the SHINE randomized clinical trial. *JAMA*. doi:10.1001/jama.2019.9346

### **Complete listing of committees and coordinating centers in the SHINE Trial**

#### **SHINE participating sites that enrolled 0 patients**

#### **List of nonauthor contributors**

**eTable 1.** Additional baseline and treatment information of the patients

**eTable 2.** Secondary analyses of primary and secondary outcomes

**eTable 3.** Baseline characteristics and treatment information by highest enrolling sites vs all other sites by treatment group

**eFigure 1.** Primary efficacy outcome, according to subgroups

**eFigure 2.** Relative risk and 95% confidence intervals for reported serious adverse events

This supplementary material has been provided by the authors to give readers additional information about their work.

## **SHINE Trial: Committees and Coordinating Centers**

In addition to the authors, the following individuals contributed to the SHINE Trial:

### **Executive Committee**

Karen C. Johnston, MD, MSc, William G. Barsan, MD, Valerie L. Durkalski-Mauldin, PhD, Qi Pauls, MS, Kavita Patel, BS, RN, Askiel Bruno, MD, MSc, Kevin M. Barrett, MD, MSc, Christiana E. Hall, MD, MS, Katrina Van de Bruinhorst, MS, Heather M. Haughey, PhD, Sonya A. Gunter, MS, Ruth R.R. Lewis, MS, RN, William Meurer, MD, MS, Valerie Stevenson, BAS, RRT, CCRP, Scott Janis, PhD

### **Recruitment Committee**

Karen C. Johnston, MD, MSc, Askiel Bruno, MD, MSc, Kevin M. Barrett, MD, MSc, Christiana E. Hall, MD, MS, Katrina Van de Bruinhorst, MS, Heather M. Haughey, PhD, Kavita Patel, BS, RN, Ruth R.R. Lewis, MS, RN, Sonya A. Gunter, MS, Amy Fansler, MPH

### **Publication Committee**

Askiel Bruno, MD, MSc, William Meurer, MD, MS, Karen C. Johnston, MD, MSc, Christiana E. Hall, MD, MS, Valerie L. Durkalski-Mauldin, PhD, Robert Silbergleit, MD, Scott Janis, PhD, Amy Fansler, MS

### **NETT Clinical Coordinating Center**

William Barsan, MD, Joy Black, BSN, RN, MS, Allison Kade Fox, MD, MS, Shirley Frederiksen, BSN, MS, Donna Harsh, MS, Ruth R. R. Lewis, MS, RN, William J. Meurer, MD, MS, Arthi Ramakrishnan, MS, CCRP, Robert Silbergleit, MD, Cemal Sozener, MD, MEng, Valerie Stevenson BAS, RRT, CCRP, Carol Van Huysen, BS, CCRP

### **NETT Statistical and Data Coordinating Center**

Valerie L. Durkalski-Mauldin, PhD, Qi Pauls, MS, Kavita Patel, BS, RN, Catherine R. Dillon, MS, Yuko Palesch, PhD, Keith Pauls, BS, Jaemyung Kim, MS, Wenle Zhao, PhD

### **Data and Safety Monitoring Board**

Michael D. Hill, MD, Susan Shapiro Braithwaite, MD, William R. Clarke, PhD, Jennifer Frontera, MD, Kama Guluma, MD, Rema Raman, PhD, Jeffery L. Saver, MD, Joshua N. Goldstein, MD, PhD, Janice Cordell BSN, MPH

### **SHINE Mimic Adjudication Team**

Andrew M. Southerland, MD, MSc, Jeffery A. Switzer, MD

### **Independent Safety Monitor**

Thomas Bleck, MD

### **SHINE Diabetologists**

Mercedes Falciglia, MD

Rattan Juneja, MD

### **Medical Decisions Network, LLC**

Greg Menke, Will Menke, Denise Zito, Charlie Rogers, Sei Kim, Paula Maurer, RN, BSN

**National Institute of Neurological Disorders and Stroke - National Institutes of Health**

Scott Janis, PhD, Carolina Mendoza-Puccini, MD, Janice Cordell BSN, MPH

**SHINE participating sites that enrolled 0 patients**

| Hub        | Site                                                                | Principal Investigator | Primary Study Coordinator |
|------------|---------------------------------------------------------------------|------------------------|---------------------------|
| Minnesota  | University of Kansas Hospital, Kansas City, KS                      | Michael Abraham        | Alison Boyotston          |
| Ohio State | Miami Valley Hospital, Dayton, OH                                   | John Terry             | Angela Shoen              |
| Temple     | Hackensack University Medical Center, Hackensack, NJ                | Chinwe Ogedegbe        | Arelis Villot-Santiago    |
| UCSF       | California Pacific Medical Center Davies Campus, San Francisco, CA  | Nobl Barazangi         | Katie Ponting             |
| UCSF       | California Pacific Medical Center Pacific Campus, San Francisco, CA | Nobl Barazangi         | Katie Ponting             |
| VCU        | VCU Medical Center, Richmond, VA                                    | Warren Felton III      | Margot Lee                |
| Wayne      | William Beaumont Hospital, Royal Oak, MI                            | Robert Swor            | Heather Grace             |

## List of nonauthor contributors

### SHINE participating sites that enrolled more than 100 patients

**NYP (136)**

**Hub PI:** Jan Claassen

| Site                                   | Role                    | Team Member                                                                                                                                                                                                                                                                                                                                                                                                                                                                                     |
|----------------------------------------|-------------------------|-------------------------------------------------------------------------------------------------------------------------------------------------------------------------------------------------------------------------------------------------------------------------------------------------------------------------------------------------------------------------------------------------------------------------------------------------------------------------------------------------|
| NYP Columbia University Medical Center | Principal Investigators | Jan CLAASSEN, Stephan MAYER                                                                                                                                                                                                                                                                                                                                                                                                                                                                     |
|                                        | Co-Investigator(s)      | Abid QURESHI, Alexander MERKLER, Alexandra REYNOLDS, Ali MAHTA, Andrew BAUERSCHMIDT, Andrew MARTIN, Aws ALAWI, Ayham ALKHACHROUM, Charles ESENWA, Clio A. RUBINOS, David ROH, Elie DANCOUR, Eliza MILLER, Fawaz AL MUFTI, Jeremy RAGLAND, Jiaying (Jayne) ZHANG, Joshua WILLEY, Kara R MELMED, Michael REZNIK, Neal S. PARIKH, Nicholas MORRIS, Sachin AGARWAL, Sara ROSTANSKI, Setareh S OMRAN, Shadi YAGHI, Shivani GHOSHAL, Shouri LAHIRI, Soojin PARK, Teresa MAY, Tim LEKIC, Tomoko KITAGO |
|                                        | Study Coordinator(s)    | Adu MATORY, Angela VELAZQUEZ, Anna CALDERON, Ashley RODRIGUEZ, Caroline COUCH, Cristina FALO, Emma MEYERS, Gregory MATHELIER, Juani FELIZ, Judy LI, Riva LETCHINGER, Sara BRANDT, Stephanie THOMPSON                                                                                                                                                                                                                                                                                            |
|                                        | Nurse Champion(s)       | Philomena JOHN, Rebecca GORDON                                                                                                                                                                                                                                                                                                                                                                                                                                                                  |

**Emory (135)**

**Hub PI:** David W Wright

| Site                      | Role                   | Team Member                                                                                                                                                                                                                                                                                                                 |
|---------------------------|------------------------|-----------------------------------------------------------------------------------------------------------------------------------------------------------------------------------------------------------------------------------------------------------------------------------------------------------------------------|
| Grady Memorial Hospital   | Principal Investigator | Vishal Patel                                                                                                                                                                                                                                                                                                                |
|                           | Co-Investigator(s)     | Aaron ANDERSON, Andrey LIMA, Anika BACKSTER, Anna KATEMA, David W WRIGHT, Fadi NAHAB, Harrison PEARL, Haseeb RAHMAN, Jonathan RATCLIFF, Mahmoud OBIDEEN, Melanie WINNINGHAM, Michael FRANKEL, Minas GEBRU, NICOLE MAHDI, Robin DHARIA, Samir BELAGAJE, SOURABH LAHOTI, Tamara ESPINOZA, Vijayakumar JAVALKAR, Yasir SALEEM, |
|                           | Study Coordinator(s)   | Alex HALL, Andrea MCDOUGAL, Avou NASSER, DALE DANIEL, Grzegorz DANIELCZOK, Iasson YI, John Paul PAPADOPOULOS, Leah CRAFT, Lovie NEGRIN, MIKE LUNNEY, Natasha MANN, Nick CIARAVELLA, Nick STANLEY, Salim ELHALABY, Stephen HATEZ                                                                                             |
|                           | Nurse Champion         | Donna BARNETT                                                                                                                                                                                                                                                                                                               |
| Emory University Hospital | Principal Investigator | Vishal Patel                                                                                                                                                                                                                                                                                                                |
|                           | Co-Investigator(s)     | Aaron ANDERSON, Andrey LIMA, Anika BACKSTER, Anna KATEMA, David W WRIGHT, Fadi NAHAB, Harrison PEARL, Haseeb RAHMAN, Jonathan RATCLIFF, Mahmoud OBIDEEN, Melanie WINNINGHAM, Michael FRANKEL, Minas GEBRU,                                                                                                                  |

|                                   |                        |                                                                                                                                                                                                                                                                                                                                                  |
|-----------------------------------|------------------------|--------------------------------------------------------------------------------------------------------------------------------------------------------------------------------------------------------------------------------------------------------------------------------------------------------------------------------------------------|
|                                   | Study Coordinator(s)   | NICOLE MAHDI, Robin DHARIA, Samir BELAGAJE, SOURABH LAHOTI, Tamara ESPINOZA, Vijayakumar JAVALKAR, Yasir SALEEM, Alex HALL, Andrea MCDOUGAL, Avou NASSER, DALE DANIEL, Grzegorz DANIELCZOK, Iasson YI, John Paul PAPADOPOULOS, Leah CRAFT, Lovie NEGRIN, MIKE LUNNEY, Natasha MANN, Nick CIARAVELLA, Nick STANLEY, Salim ELHALABY, Stephen HATEZ |
|                                   | Nurse Champion         | Mary Grace YBANEZ                                                                                                                                                                                                                                                                                                                                |
| Emory University Hospital Midtown | Principal Investigator | Vishal Patel                                                                                                                                                                                                                                                                                                                                     |
|                                   | Co-Investigator(s)     | Aaron ANDERSON, Andrey LIMA, Anika BACKSTER, David W WRIGHT, Fadi NAHAB, Jonathan RATCLIFF, Mahmoud OBIDEEN, Melanie WINNINGHAM, Michael FRANKEL, Minas GEBRU, Robin DHARIA, Samir BELAGAJE, Tamara ESPINOZA, Vijayakumar JAVALKAR                                                                                                               |
|                                   | Study Coordinator(s)   | Alex HALL, Andrea MCDOUGAL, Avou NASSER, DALE DANIEL, Iasson YI, Leah CRAFT, Lovie NEGRIN, MIKE LUNNEY, Nick STANLEY, Salim ELHALABY, Stephen HATEZ                                                                                                                                                                                              |
|                                   | Nurse Champion(s)      | Kim LUCAS                                                                                                                                                                                                                                                                                                                                        |

**Enrolled 70 – 100 patients**

**Ohio State (79)**      *Hub PI:* Michel Torbey; Diana Greene-Chandos

| Site                      | Role                   | Team Member                                                                                                                         |
|---------------------------|------------------------|-------------------------------------------------------------------------------------------------------------------------------------|
| OSU Wexner Medical Center | Principal Investigator | Michel TORBEY, Diana GREENE-CHANDOS                                                                                                 |
|                           | Co-Investigator(s)     | Archana HINDUJA, Deepak GULATI, Jeffrey CATERINO, Yousef HANNAWI, Shraddha MAINALI                                                  |
|                           | Study Coordinator(s)   | Ana Maria GOMEZ RAMIREZ, Areej TARIQ, Mohammad HAMED, Muhammad NASIR, Murat SARI, Nirav PATEL, Sara URIO, Weiping YE                |
|                           | Nurse Champion         | Dorina HARPER                                                                                                                       |
| Summa Akron City Hospital | Principal Investigator | Susana BOWLING                                                                                                                      |
|                           | Study Coordinator(s)   | Janie WEINHARDT, Kimberly SZYMCZAK (BALLARD), Linette MERCER, Patricia KOCHANOSKI, Rachelle SCHARSU, Robin ROTH, Sara-Jane SALSTROM |

**Enrolled 50 – 69 patients**

**Kentucky (54)**      *Hub PI:* Roger Humphries

| Site                            | Role                   | Team Member                                                                                                                      |
|---------------------------------|------------------------|----------------------------------------------------------------------------------------------------------------------------------|
| University of Kentucky Hospital | Principal Investigator | Roger HUMPHRIES                                                                                                                  |
|                                 | Co-Investigator(s)     | Craig CARTER, Creed PETTIGREW, Joel HAMM, Matthew DAWSON, Pamela KOUNS, Peter AKPUNONU, Sameer DESAI, Tammy BRYANT, Terren TROTT |
|                                 | Study Coordinator(s)   | Joann SHORT, Linda DECHTENBERG, Randol BROWN, Theresa MIMS, Debby TAYLOR, Brian DENNIS                                           |

**Pittsburgh (53)** *Hub PI:* Cliff Callaway

| Site                       | Role                   | Team Member                                                                                                                                         |
|----------------------------|------------------------|-----------------------------------------------------------------------------------------------------------------------------------------------------|
| UPMC Presbyterian Hospital | Principal Investigator | Lori SHUTTER                                                                                                                                        |
|                            | Co-Investigator(s)     | Alexandra WEISSMAN, Ankur DOSHI, Cameron DEZFULIAN, Cliff CALLAWAY, Frank GUYETTE, Jon RITTENBERGER, Jonathan ELMER, Lawrence WECHSLER, Tudor JOVIN |
|                            | Study Coordinator(s)   | Mary STEFANICK, Sara DIFIORE, Sharon DECESARE, Stacey STULL, Vicki GILCHRIST, Peter ADAMS, Erin GILCHRIST, Erin GRAMM, Megan BUHAY                  |
|                            | Nurse Champion(s)      | Melissa CURTIS, Theresa LUCCHITTI                                                                                                                   |
| UPMC Mercy Hospital        | Principal Investigator | Lori SHUTTER                                                                                                                                        |
|                            | Co-Investigator(s)     | Christine HAWKES                                                                                                                                    |
|                            | Study Coordinator(s)   | Janara KOEHLER, Margaret RUSSELL, Michal HAMMOND                                                                                                    |
|                            | Nurse Champion(s)      | Amy SKRITCH, Tammy VOGEL                                                                                                                            |

**UVA (53)**

| Site                                 | Role                   | Team Member                                                                                                                                                                                                                                                                                                                                                                                                                                                                                                                                                                                                                                                                                                                                                                                                                                                                                                                                                                                                                |
|--------------------------------------|------------------------|----------------------------------------------------------------------------------------------------------------------------------------------------------------------------------------------------------------------------------------------------------------------------------------------------------------------------------------------------------------------------------------------------------------------------------------------------------------------------------------------------------------------------------------------------------------------------------------------------------------------------------------------------------------------------------------------------------------------------------------------------------------------------------------------------------------------------------------------------------------------------------------------------------------------------------------------------------------------------------------------------------------------------|
| University of Virginia Health System | Principal Investigator | Karen JOHNSTON                                                                                                                                                                                                                                                                                                                                                                                                                                                                                                                                                                                                                                                                                                                                                                                                                                                                                                                                                                                                             |
|                                      | Co-Investigator(s)     | Alex DALRYMPLE, Allison CROWELL, Amal ABU LIBDEH, Andrew SCHOMER, Andrew SOUTHERLAND, Bradford WORRALL, Brian SORACE, Christina CHEE, Christopher GROTH, Christopher VACHON, Clark HALEY, Daniel ARTEAGA, Daryl GRESS, David LAPIDES, David MCCOLLUM, David TAPLINGER, Dennis COLE, Derek PYLAND, Elizabeth HUNDT, Erika AXEEN, Erin FOFF, Firas ABDULMAJEED, Greg KUHLMAN, Halley BRIGLIA, James ADDINGTON, Jasmin JO, Jason CROWELL, Jimmy BERTHAUD, Joseph CARRERA, Julie ZHOU, Kathryn NEVEL, Kelsey SATKOWIAK, Kiran KANTH, Lauren MAHONEY, Lauren TALMAN, Liana THEROUX, Lisa TORAN, Madeline CROSS, Margaret BETTIN, Maria DIAZ-ORDONEZ, Mark MCDONALD, Matthew EHRlich, Matthew ELLIOTT, Matthew MCCONNELL, Melanie WARD, Michelle JOHANSEN, Nathaniel BEACHY, Nicole CHIOTA-MCCOLLUM, Nina SOLENSKI, Philip GASTRELL, Prachi MEHNDIRATTA, Rahul GUHA, Reza SEYEDSADJADI, Robert WIGGINS, Robin ULEP, Sarah FREDRICH, Sarah TISEL, Sneha MANTRI, Surabhi RANJAN, Thomas TANDY, Uzoamaka UGOCHUKWU, Vanesa BOTSFORD |
|                                      | Study Coordinator(s)   | Amy FANSLER, Heather HAUGHEY, Sonya GUNTER, Stephanie LOWENHAUPT, Valerie O'DELL, Whitney POLLOCK                                                                                                                                                                                                                                                                                                                                                                                                                                                                                                                                                                                                                                                                                                                                                                                                                                                                                                                          |
|                                      | Nurse Champion         | Heather TURNER                                                                                                                                                                                                                                                                                                                                                                                                                                                                                                                                                                                                                                                                                                                                                                                                                                                                                                                                                                                                             |

**UT Houston (51)** *Hub PI:* Elizabeth Jones

| <b>Site</b>                              | <b>Role</b>             | <b>Team Member</b>                                                                                                                                                                                                                                                                                                                                                                                                 |
|------------------------------------------|-------------------------|--------------------------------------------------------------------------------------------------------------------------------------------------------------------------------------------------------------------------------------------------------------------------------------------------------------------------------------------------------------------------------------------------------------------|
| Memorial Hermann<br>Texas Medical Center | Principal Investigator  | Elizabeth JONES                                                                                                                                                                                                                                                                                                                                                                                                    |
|                                          | Co-Investigator(s)      | Amy NOLAND, Andres BAYONA, Andrew COYNE, Carlos ROLDAN, Caroline BORGAN, Carrie BAKUNAS, Emily ENDACOTT, Ian SMITH, James LEONI, Jason LESNICK, Jason SATTERFIELD, Jonas BEYENE, Joshua GUINDON, Justin SHEPARD, Kasey GILDERSLEEVE, Lindley FOLKERSON, Michael PANDYA, Natalie ELLIOTT, Omar METWALLI, Paulina SERGOT, Pratik DOSHI, Quyen HUYNH, Richard WITKOV, Salvatore VALENTI, Soa-Yih SHER, Stephen HECHT, |
|                                          | Study Coordinator(s)    | Christopher MICHELS, Dinh VUONG, Jonathan NEWSOME, Misty OTTMAN, Monica MOORE, Robert COUCHMAN, Xiuli SUN                                                                                                                                                                                                                                                                                                          |
|                                          | Nurse Champion          | Shenequa SOSTAND                                                                                                                                                                                                                                                                                                                                                                                                   |
| Valley Baptist Medical<br>Center         | Principal Investigator  | Ameer HASSAN                                                                                                                                                                                                                                                                                                                                                                                                       |
|                                          | Co-Investigator(s)      | Julio OLMEDA, Wondwossen TEKLE                                                                                                                                                                                                                                                                                                                                                                                     |
|                                          | Study Coordinator(s)    | Olive SANCHEZ, Ivette TORRES, Erlina ABANTAO, Pamela NAUERTH                                                                                                                                                                                                                                                                                                                                                       |
|                                          | Nurse Champion          | Kristen E White                                                                                                                                                                                                                                                                                                                                                                                                    |
| Seton Medical Center                     | Principal Investigators | Jason SHEN, Steven WARACH, Ameer HASSAN                                                                                                                                                                                                                                                                                                                                                                            |
|                                          | Co-Investigator(s)      | Clifford “Jack” FRAIM, Jeffrey MILEY, John BERTELSON, Kent ELLINGTON, Osvaldo PERURENA, Ray BOGITCH, TJ MILLING                                                                                                                                                                                                                                                                                                    |
|                                          | Study Coordinator(s)    | Alison VON EBERSTEIN, Ben HEYEN, Delmas MC BEE, Heidi TYLER, Jessica MORGAN, Laura LACHANCE, Lisa DAVIS, Marianna ALESI, Melissa MIGL                                                                                                                                                                                                                                                                              |
|                                          | Nurse Champion(s)       | Jonathon HECHT, Phyllis BARRON                                                                                                                                                                                                                                                                                                                                                                                     |
| Dell Seton Medical<br>Center             | Principal Investigators | Jason SHEN, Steven WARACH                                                                                                                                                                                                                                                                                                                                                                                          |
|                                          | Co-Investigator(s)      | Clifford “Jack” FRAIM, Jeffrey MILEY, John BERTELSON, Kent ELLINGTON, Osvaldo PERURENA, Ray BOGITCH, TJ MILLING                                                                                                                                                                                                                                                                                                    |
|                                          | Study Coordinator(s)    | Alison VON EBERSTEIN, Ben HEYEN, Delmas MC BEE, Heidi TYLER, Jessica MORGAN, Laura LACHANCE, Lisa DAVIS, Marianna ALESI, Melissa MIGL                                                                                                                                                                                                                                                                              |
|                                          | Nurse Champion(s)       | Jonathon HECHT, Phyllis BARRON                                                                                                                                                                                                                                                                                                                                                                                     |

**Enrolled 30 – 49  
patients**

**Augusta University (47)**

| <b>Site</b>                          | <b>Role</b>            | <b>Team Member</b>                                                                                                                              |
|--------------------------------------|------------------------|-------------------------------------------------------------------------------------------------------------------------------------------------|
| Augusta University<br>Medical Center | Principal Investigator | Askiel BRUNO                                                                                                                                    |
|                                      | Co-Investigator(s)     | David HESS, Fenwick NICHOLS, Feroze AFZAL, Hartmut GROSS, Jeffrey SWITZER, Laith MAALI, Mihaela SALER, Nabil WEES, Shannon STEWART, Uttam VERMA |
|                                      | Study Coordinator(s)   | Brian CLOSE, Erin CHRISTENSEN, Kori WILLIAMS, Linda JONES, Natalie BISHOP, Sherif SHAABAN, Sneha JACOB, Tanya MIMS, Tawanna MASSENBERG          |
|                                      | Nurse Champion         | Jill WILLIAMS                                                                                                                                   |



**Stanford (45)****Hub PI:** James Quinn

| <b>Site</b>         | <b>Role</b>                                  | <b>Team Member</b>                                                                                                                                                                                                                                                                                                                                                                                                                            |
|---------------------|----------------------------------------------|-----------------------------------------------------------------------------------------------------------------------------------------------------------------------------------------------------------------------------------------------------------------------------------------------------------------------------------------------------------------------------------------------------------------------------------------------|
| Stanford University | Principal Investigator<br>Co-Investigator(s) | Karen HIRSCH<br>Adam MACLELLAN, Adam RIZVI, Anna FINLEY-CAULFIELD, Basit RAHIM, Catherine LEGAULT, Chitra VENKATASUBRAMANIAN, Christina MIJALSKI, Christopher SOUTHWOOD, Divya PRABHU, Gracia MUI, Gregory ALBERS, Ilanit SPOKOYNY, James QUINN, Jenny TSAI, Kyle HOBBS, Maarten LANSBERG, Marion BUCKWALTER, Michael KE, Neil SCHWARTZ, Nirali VORA, Paul GEORGE, Prashanth KRISHNAMOHAN, Sarah LEE, Soo Young KWON, Sun KIM, Waimei Amy TAI |
|                     | Study Coordinator(s)                         | Anita VISWESWARAN, Carine HO, Christine KELLER, Mohit KOCHAR, Rosen MANN                                                                                                                                                                                                                                                                                                                                                                      |

**Temple (44)****Hub PI:** Nina Gentile

| <b>Site</b>                             | <b>Role</b>                                  | <b>Team Member</b>                                                                                                                                             |
|-----------------------------------------|----------------------------------------------|----------------------------------------------------------------------------------------------------------------------------------------------------------------|
| Temple University<br>Hospital           | Principal Investigator<br>Co-Investigator(s) | Nina GENTILE<br>Derek ISENBERG, Guillermo LINARES, Imama NAQVI, Jeff BARRETT, Paul KATZ, Wade DEHNKAMP, Yongwoo KIM                                            |
|                                         | Study Coordinator(s)                         | Carl BLANCHARD, Hannah REIMER, Brent FREEMAN, Leticia DOMINGO, Paige PALUMBO, Patricia MCNELIS, Vernon Sayoc KALUGDAN                                          |
|                                         | Nurse Champion                               | Suzanne DUROCHER                                                                                                                                               |
| JFK Medical Center                      | Principal Investigator<br>Co-Investigator(s) | Mohammad MOUSSAVI<br>Aashish PATEL, Ashish KULHARI, Daniel KORYA, Jaskiran BRAR, Jaward KIRMANI, Siddhart MEHTA, Spozhmy PANEZAI                               |
|                                         | Study Coordinator(s)<br>Nurse Champion(s)    | Briana DECARVALHO, Charles PORBENI<br>Darilyn PAUL, Gerald GILLEN                                                                                              |
|                                         | Principal Investigator<br>Co-Investigator(s) | Jacqueline URTECHO<br>Fred RINCON, Jack JALLO, James PEOPLES, Lauren NG, Maria Carissa PINEDA, Matthew VIBBERT, Michelle GARDECKI, Muhammad ATHAR, Rodney BELL |
| Thomas Jefferson<br>University Hospital | Study Coordinator(s)                         | Brent FREEMAN, Kara PIGOTT, Meghan-Patirica WAKEFIELD, Melissa WITT, Yvette CRUZ                                                                               |
|                                         | Principal Investigator<br>Study Coordinator  | Crystal WONG<br>Melissa TIAN                                                                                                                                   |

**WVU (36)**

| <b>Site</b>                              | <b>Role</b>                                   | <b>Team Member</b>                                                                                                     |
|------------------------------------------|-----------------------------------------------|------------------------------------------------------------------------------------------------------------------------|
| WVU Healthcare Ruby<br>Memorial Hospital | Principal Investigators<br>Co-Investigator(s) | John BRICK, Muhammad ALVI<br>Amelia ADCOCK, Arshi NAZ, Erica BLACKWELL, Jessica PERINI, Martha POWER, Sara DOBRZYNSKI, |

Study Coordinator(s) Todd CROCCO, Vicki CHASE  
 Hannah YETZER, Jay SHERMAN, Jennifer DOMICO,  
 Patricia ALTEMUS, Steve DAVIS  
 Nurse Champion(s) Martha POWER, Tanya SMITH

---

**UPENN (36)**

**Hub PI:** Jill Baren

| <b>Site</b>                                | <b>Role</b>            | <b>Team Member</b>                                                                                                                                                                                                                                                                                                                                       |
|--------------------------------------------|------------------------|----------------------------------------------------------------------------------------------------------------------------------------------------------------------------------------------------------------------------------------------------------------------------------------------------------------------------------------------------------|
| Hospital of the University of Pennsylvania | Principal Investigator | Brett CUCCHIARA                                                                                                                                                                                                                                                                                                                                          |
|                                            | Co-Investigator(s)     | Ali ZANDIEH, Ava LIBERMAN, Cen ZHANG, Christina BLUM, Christopher FAVILLA, Christopher RENNER, Claude NGUYEN, Colin QUINN, Donna KUROWSKI GEORGE, Glenn KONSKY, James SIEGLER, Jean LUCIANO, Jesse THON, Jill BAREN, Judy JIA, Kelley HUMBERT, Kimberly GANNON, Laura STEIN, Michael MCGARVEY, Michael MULLEN, QingYang YUAN, Scott KASNER, Steven MESSE |
|                                            | Study Coordinator(s)   | Andrew LAYNE, Christopher GIBSON, Dana BROWN, Devin KEATING, Erica DAHLMEIER, Gabriel SCHWARTZ, Jason MARSHALL, Joel DURINKA, Katherine (Lamond) BLACKBURN, Mary Elizabeth DESANTO, Melissa YATES, Nichole GALLATTI, Sean SPANGLER, Yohko OGAWA                                                                                                          |
|                                            | Nurse Champion         | Jeanie LUCIANO                                                                                                                                                                                                                                                                                                                                           |
| Abington Memorial Hospital                 | Principal Investigator | David WEISMAN                                                                                                                                                                                                                                                                                                                                            |
|                                            | Co-Investigator(s)     | Brad KLEIN, Brett CUCCHIARA, Dan GZESH, James COOK, John KHOURY, Lee HARRIS                                                                                                                                                                                                                                                                              |
|                                            | Study Coordinator(s)   | Allyson BLUE-SCHALLER, Denise GALLAGHER, Jennifer MCGOWAN TRAINER, Katherine (LAMOND) BLACKBURN, Priyahareshni GNANASEKAR                                                                                                                                                                                                                                |
| WellSpan York Hospital                     | Principal Investigator | Brent BECKER                                                                                                                                                                                                                                                                                                                                             |
|                                            | Co-Investigator(s)     | David LEE, Erik KOCHERT, Guy YOUNGBLOOD, Jeremy HUTCHINS, Mark GONZALES, Matthew STEPHENS, Robert STUNTZ, Thomas YEICH, William FIELDS                                                                                                                                                                                                                   |
|                                            | Study Coordinator(s)   | Barbie STAHLMAN                                                                                                                                                                                                                                                                                                                                          |
|                                            | Nurse Champion         | Teri REBERT                                                                                                                                                                                                                                                                                                                                              |

**Wayne State (35)**

**Hub PI:** Robert Welch

| <b>Site</b>                | <b>Role</b>             | <b>Team Member</b>                                                                                                                                                                                                                                                                                                                                                                                                           |
|----------------------------|-------------------------|------------------------------------------------------------------------------------------------------------------------------------------------------------------------------------------------------------------------------------------------------------------------------------------------------------------------------------------------------------------------------------------------------------------------------|
| Detroit Receiving Hospital | Principal Investigators | Benjamin ATKINSON, Claire PEARSON, Greg NORRIS, Wazim MOHAMED                                                                                                                                                                                                                                                                                                                                                                |
|                            | Co-Investigator(s)      | Brian O'NEIL, Robert SHERWIN, Robert WELCH, Pratik BHATTACHARYA, Preet VARADE                                                                                                                                                                                                                                                                                                                                                |
|                            | Study Coordinator(s)    | Alessandra PALAZZOLO, Alexandra DEZIA, Antoine KHOURY, Arslan MAHMOOD, Atika SINGH, Craig MCLENDON, Craig THOMAS, Farhan AYAZ, Jonathon OTTOLINI, Joshua PHILLIP, Justin SABOL, Mitchell HOYER, Patrice WADE, Patrick MEDADO, Payal KAPADIA, Randy KASS-SHAMOUN, Reba JOHN, Robert KAS-SHAMOUN, Saikat BHUIYAN, Samaa RIZK, Samuel CECKOWSKI, Shobi MATHEW, Sydnie BROWN, Syed Imran AYAZ, Theodore FALCON, Thomas MAZZOCCO, |
|                            | Nurse Champion          |                                                                                                                                                                                                                                                                                                                                                                                                                              |

Valerie MIKA  
Sheri FRANK

|                                  |                         |                                                                                                                                                                                                                                                                                                                                                                                                                         |
|----------------------------------|-------------------------|-------------------------------------------------------------------------------------------------------------------------------------------------------------------------------------------------------------------------------------------------------------------------------------------------------------------------------------------------------------------------------------------------------------------------|
| Sinai-Grace Hospital             | Principal Investigators | Claire PEARSON, Greg NORRIS, Wazim MOHAMED                                                                                                                                                                                                                                                                                                                                                                              |
|                                  | Co-Investigator(s)      | Brian O'NEIL, Robert SHERWIN, Robert WELCH, Pratik BHATTACHARYA                                                                                                                                                                                                                                                                                                                                                         |
|                                  | Study Coordinator(s)    | Alessandra PALAZZOLO, Alexandra (BARANYK) DEZIA, Arslan MAHMOOD, Atika SINGH, Craig MCLENDON, Craig THOMAS, Farhan AYZAZ, Jonathon OTTOLINI, Joshua PHILLIP, Justin SABOL, Mitchell HOYER, Patrick MEDADO, Payal KAPADIA, Randy KASS-SHAMOUN, Reba JOHN, Robert KAS-SHAMOUN, Saikat BHUIYAN, Samaa RIZK, Samuel CECKOWSKI, Shobi MATHEW, Sydnie BROWN, Syed Imran AYZAZ, Theodore FALCON, Thomas MAZZOCCO, Valerie MIKA |
| William Beaumont Hospital - Troy | Principal Investigator  | Aveh BASTANI                                                                                                                                                                                                                                                                                                                                                                                                            |
|                                  | Co-Investigator(s)      | Aharon Gedaliah COOPER, Albert ROCCHINI, Brett TODD, David DONALDSON, Matthew CHRISTENSEN, Michael OPSOMMER, Steven DIMSDALE                                                                                                                                                                                                                                                                                            |
|                                  | Study Coordinator(s)    | Blerina POPLE, Heather GRACE, Heonia HILLOCK, Kathleen MAYS-WILSON, Kristen PALOMBA, Megan HAUSLER, Pamela MARSACK, Ryan PATERNOSTER                                                                                                                                                                                                                                                                                    |

#### Mayo Clinic (34)

| Site        | Role                   | Team Member                                                                                                                |
|-------------|------------------------|----------------------------------------------------------------------------------------------------------------------------|
| Mayo Clinic | Principal Investigator | Kevin BARRETT                                                                                                              |
|             | Co-Investigator(s)     | Benjamin EIDELMAN, William David FREEMAN, Josephine HUANG, Maisha ROBINSON, James MESCHIA                                  |
|             | Study Coordinator(s)   | Alexa RICHIE, Cristin WILLIAMS, Dale GAMBLE, Emily EDWARDS, Jaya VIJAYAN, Sabrina SELMAN, Sothea LUKE, Veronica MUNET-DIAZ |
|             | Nurse Champion         | Lesia MOONEY                                                                                                               |

#### Cincinnati (33) *Hub PI:* Opeolu Adeoye

| Site                                    | Role                   | Team Member                                                                                                                                                                                                                                                                                                                                                                                                                                                                                            |
|-----------------------------------------|------------------------|--------------------------------------------------------------------------------------------------------------------------------------------------------------------------------------------------------------------------------------------------------------------------------------------------------------------------------------------------------------------------------------------------------------------------------------------------------------------------------------------------------|
| University of Cincinnati Medical Center | Principal Investigator | Opeolu ADEOYE                                                                                                                                                                                                                                                                                                                                                                                                                                                                                          |
|                                         | Co-Investigator(s)     | Adam JASNE, Anna GENSIC, Art PANCIOLI, Brett KISSELA, Brian KATZ, Brian OLOIZIA, Brian STETTLER, Bryan ECKERLE, Daniel KANTER, Daniel WOO, Dawn KLEINDORFER, Elisheva COLEMAN, Erin MCDONOUGH, Jonah GROSSMAN, Jordan BONOMO, Joseph BRODERICK, Julian MACEDO, Katrina PEARISO, Kyle WALSH, Matthew FLAHERTY, Mercedes FALCIGLIA, Michael STAR, Muhammad ZAGHLOULEH, Natalie KREITZER, Pooja KHATRI, Rahul KARAMCHANDANI, Sabreena GILLOW, Sameer SHARMA, Simona FERIOLI, Stacie DEMEL, William KNIGHT |
|                                         | Study Coordinator(s)   | Abigail VOLLMER, Alisha HODGE, Amanda NACIFF-CAMPOS, Anthony SPUZZILLO, Anthony WOLFER, Azeem AHMAD, Cindy CALLIHAN, Danielle CHIN,                                                                                                                                                                                                                                                                                                                                                                    |

Devaughn CRAWFORD, Elizabeth MEYER, Emily GOODALL, Erin BELL, Erin NEEFUS, Hannah VESTER, Hilary PEREZ, Irene EWING, Irene EWING, Jacob LUTZ, Jamey FRASURE, Janice CARROZZELLA, Jessica DEATON, Judith SPILKER, Julie BROCKMAN, Kathleen HARRISON, Kelsey BLAZE, Krista SWEGHEIMER, Laura SYORI, Lauren KEENE, Lauren TERRY, Lena TABBAA, MacKenzie SHIVERS, Maria DODD, Matt MANNION, Michele JASNE, Mikayla VACLAV, Misty WETHINGTON, Mollie MOSLEY, Naila MERCHANT, Nate BRUNTY, Nick LOCAPUTO, Pamela KIMMEL, Pamela SCHMIT, Raechel COOLEY, Samantha KRAMER, Sara KEEGAN, Shannon DEEDS, Steven GAYDA

**Enrolled 10 – 29 patients**

**Utah (29)**

| <b>Site</b>                   | <b>Role</b>            | <b>Team Member</b>                                                                                                                                                                                |
|-------------------------------|------------------------|---------------------------------------------------------------------------------------------------------------------------------------------------------------------------------------------------|
| University of Utah Healthcare | Principal Investigator | Jana WOLD                                                                                                                                                                                         |
|                               | Co-Investigator(s)     | Adam DEHAVENON, Aleks TKACH, Alex LINN, Alicia BENNETT, Brian MARCUS, Chelsea MEYER, Dana DEWITT, Jennifer MAJERSIK, Jerdan RUFF, Lee CHUNG, Muhammad Nabeel CHAUHAN, Peter HANNON, Raymond GRAMS |
|                               | Study Coordinator(s)   | Crystal NEATE, Joshua LETSINGER, Ka-Ho WONG, Kinga AITKEN, Lilly Siauto FAGATELE, Michael DELA CRUZ, Sara WOLTZ, Stephen CHATWIN, Suyi NIU                                                        |
|                               | Nurse Champion         | Julie MARTINEZ                                                                                                                                                                                    |

**SUNY Downstate (24) *Hub PI:* Steven Levine**

| <b>Site</b>                              | <b>Role</b>             | <b>Team Member</b>                                                                                                                                                                                                      |
|------------------------------------------|-------------------------|-------------------------------------------------------------------------------------------------------------------------------------------------------------------------------------------------------------------------|
| Lincoln Medical and Mental Health Center | Principal Investigators | Nicholas CAPUTO, Steven LEVINE, Raghu LOGANATHAN                                                                                                                                                                        |
|                                          | Co-Investigator(s)      | Balavenkatesh KANNA, Kennedy OMONUWA, Misbahuddin KHAJA, Riyadh BASIR, Shekar MURTHY                                                                                                                                    |
|                                          | Study Coordinator(s)    | Jessica MONTALVO, Martha Ivett KYRIACOU, Colette NGAJURE                                                                                                                                                                |
|                                          | Nurse Champion(s)       | Lisa GRIPPO, Margaret PEREIRA                                                                                                                                                                                           |
| SUNY Downstate Medical Center            | Principal Investigator  | Steven LEVINE                                                                                                                                                                                                           |
|                                          | Co-Investigator(s)      | Adrain MARCHIDANN, Artem SUNIK, Ashika JAIN, Diana ROJAS-SOTO, Helen VALSAMIS, Jennifer MARTINDALE, Lorenzo PALADINO, Qing HAO, Richard JACKSON, Richard SINERT, Shahriar ZEHTABCHI, Susan LAW, Weijun JIN, Yongwoo KIM |
|                                          | Study Coordinator(s)    | Bryce PETTY, Jonathan SINGER, Nadege GILLES, Sarah (ZELONIS) WEINGAST                                                                                                                                                   |
|                                          | Nurse Champion(s)       | Mr. EADDY, Ms. WATSON-GREY                                                                                                                                                                                              |
| Kings County Medical Center              | Principal Investigator  | Jennifer MARTINDALE, Susan LAW                                                                                                                                                                                          |
|                                          | Co-Investigator(s)      | Steven LEVINE, Ethan BRANDLER, Benedict TAN,                                                                                                                                                                            |

|                           |                         |                                                                                                                               |
|---------------------------|-------------------------|-------------------------------------------------------------------------------------------------------------------------------|
|                           | Study Coordinator(s)    | Volodymyr VULKANOV, Pia CHATTERJEE<br>Shreya PANDYA, Bryce PETTY, Jonathan SINGER,<br>Nadege GILLES, Sarah (ZELONIS) WEINGAST |
|                           | Nurse Champion          | Dorothy SALMON-LINDSAY                                                                                                        |
| Maimonides Medical Center | Principal Investigators | Steven RUDOLPH                                                                                                                |
|                           | Co-Investigator(s)      | Christian FROMM                                                                                                               |
|                           | Study Coordinator(s)    | Alla SHAPIRO, Antonios LIKOUREZOS, Ilyya PUSHKAR,<br>Rukhsana HOSSAIN, Nadege GILLES, Sarah (ZELONIS)                         |
|                           | Nurse Champion(s)       | WEINGAST<br>Holly MORHAIM, Marlene ALEXIS-FRANCIS, Yelena ILYASOVA                                                            |

**Minnesota (19)**      *Hub PI:* Michelle Biros

| <b>Site</b>                            | <b>Role</b>            | <b>Team Member</b>                                                                                                                                                                                                                                                                                                                      |
|----------------------------------------|------------------------|-----------------------------------------------------------------------------------------------------------------------------------------------------------------------------------------------------------------------------------------------------------------------------------------------------------------------------------------|
| Hennepin County Medical Center         | Principal Investigator | Ivan MATOS DIAZ, Michelle BIROS, Mustapha EZZEDDINE                                                                                                                                                                                                                                                                                     |
|                                        | Co-Investigator(s)     | Katherine JACOBY, Rwoof RESHI<br>Benjamin MILLER, Christopher STREIB, Daraspreet KAINTH, Divyajot SANDHU, Haralabos ZACHARATOS, Huseyin TORE, Jae KIM, Jamie STARKS, Kenneth SHEA , Laura FOSTER, Mohammed ALKUWAITI, Nathan SIT, Saritha KUNDOOR, Shailesh MALE, Shola ALUKO, Taka HIGASHIMORI                                         |
|                                        | Study Coordinator(s)   | Abbey STAUGAITIS, Amanda WELLER, Audrey HENDRICKSON, Catherine NEWCOMB, Chloe LAWYER, David HILDEBRANDT, Eric JATON, Julie SCHERBER, Justin EKLUND, Kathleen MILLER, Michelle LAMBERT                                                                                                                                                   |
|                                        | Nurse Champion         | LAMBERT<br>Josh GRAMLING                                                                                                                                                                                                                                                                                                                |
| University of Minnesota Medical Center | Principal Investigator | Mustapha EZZEDDINE, Rwoof RESHI, Oladi BENTHO                                                                                                                                                                                                                                                                                           |
|                                        | Co-Investigator(s)     | Benjamin MILLER, Christopher STREIB, Daraspreet KAINTH, Divyajot SANDHU, Haralabos ZACHARATOS, Huseyin TORE, Jae KIM, Jamie STARKS, Kalyan SAJJA, Kenneth SHEA, Kristen BARKLOW, Laura FOSTER, Michelle BIROS, Mohammed ALKUWAITI, Nathan SIT, Saritha KUNDOOR, Shailesh MALE, Sherief BOSS, Shola ALUKO, Taka HIGASHIMORI, Tapan MEHTA |
|                                        | Study Coordinator(s)   | Abbey STAUGAITIS, Amanda WELLER, Audrey HENDRICKSON, Catherine NEWCOMB, Chloe LAWYER, David HILDEBRANDT, Eric JATON, Julie SCHERBER, Justin EKLUND, Kathleen MILLER, Michelle LAMBERT                                                                                                                                                   |
|                                        | Nurse Champion         | LAMBERT<br>Mary Fran TRACY                                                                                                                                                                                                                                                                                                              |

**Wisconsin (19)**      *Hub PI:* Tom Aufderheide

| <b>Site</b>                          | <b>Role</b>            | <b>Team Member</b>                                                                                                                                                               |
|--------------------------------------|------------------------|----------------------------------------------------------------------------------------------------------------------------------------------------------------------------------|
| Froedtert Memorial Lutheran Hospital | Principal Investigator | John LYNCH                                                                                                                                                                       |
|                                      | Co-Investigator(s)     | Marc LAZZARO, Osama ZAIDAT, Paul KNUDSON, Riccardo COLELLA, Tom AUFDERHEIDE, Albert YEE, Ann HELMS, Anne JOHNSON, Cory WILSON, Craig SKOLD, Dennis SHEPHERD, Diane BOOK, Eduardo |

|                      |                                                                                                                                                                                                                                                                                                                                                                                                                                                                                                                                                                                                                            |
|----------------------|----------------------------------------------------------------------------------------------------------------------------------------------------------------------------------------------------------------------------------------------------------------------------------------------------------------------------------------------------------------------------------------------------------------------------------------------------------------------------------------------------------------------------------------------------------------------------------------------------------------------------|
|                      | CASTRO, Edward BARTHELL, Gary GERSCHKE, Heidi HARKINS, Howie CROFT, Jeff GLASPY, John WHITCOMB, Jonathan RUBIN, Keith RADER, Mike BRIN, Orlando ALVAREZ, Paul COOGAN, Peter HOLZHAUER, Shekar KURPAD, Steven MOTARJEME, Thomas REMINGA, Vijay JOHNSON, William HASELOW, William KUMPREY                                                                                                                                                                                                                                                                                                                                    |
| Study Coordinator(s) | Adam DRENT, Alicia CLAUSEL, Amanda EMMRICH, Amy HESSETHALER, Ashley WUERL, Bethany QUERING, Caroline HERDEMAN, Carolyn HEAL, Christopher SANDOVAL, Danielle SPARROW, Denise HALVORSEN, Disha CHHEDA, Geri PRICE, Igli ARAPI, Jacob LABINSKI, Jamie JASTI, Jasmine BALANGUE, Joe BRANDT, Karla HANSEN, Katherine BURPEE, Laura TONYAN, Linda MATTRISCH, Lisa MARTIN, Madeline ZEISSE, Melissa BOETTCHER, Melissa HELM (KNIGHT), Melissa MENA, Mitchell SAUDER, Rachel WEBER, Samantha GAUGER, Sarah ABDALLAH, Sonia MALDONADO-SCHMIDT, Stephanie ZELLNER, Tiffany BOWEN, Tiffany SCHUSTER, Tonia QAISAR, William VON RUEDEN |

---

**HFHS (18)**      *Hub PI:* Christopher Lewandowski

| <b>Site</b>                                | <b>Role</b>            | <b>Team Member</b>                                                                                                                                                                                                                                                                                                                       |
|--------------------------------------------|------------------------|------------------------------------------------------------------------------------------------------------------------------------------------------------------------------------------------------------------------------------------------------------------------------------------------------------------------------------------|
| Henry Ford Hospital                        | Principal Investigator | Christopher LEWANDOWSKI, Shaneela MALIK                                                                                                                                                                                                                                                                                                  |
|                                            | Co-Investigator(s)     | Angelos KATRAMADOS, Daniel MILLER, Hebah HEFZY, Joseph MILLER, Jumana NAGARWALA, Panayiotis MITSIAS, Raymond FOWKES, Stephan MAYER, Taher VOHRA                                                                                                                                                                                          |
|                                            | Study Coordinator(s)   | Amanda ROBICHAUD, Amjad TARBOOSH, Anne Marie LUNDELL, Christopher PRICE, Jacob ROSS, Jared GOLDBERG, Jo-Ann RAMMAL, John FRANCE, Kaitlin ROSE, Kaleem CHAUDHRY, Kathleen MAYS-WILSON, Melissa ODDO, Meri MUMINOVIC, Randy BITRUS, Richard THOMPSON, Sean-Matthew CALO, Shannen BERRY, Shantel GRIFFIN-REED, Syed RAHMAN, Theresa MCQUAID |
|                                            | Nurse Champion         | Anna SECEN-ULAKOVICH                                                                                                                                                                                                                                                                                                                     |
| University of Michigan University Hospital | Principal Investigator | Kyle SHEEHAN                                                                                                                                                                                                                                                                                                                             |
|                                            | Co-Investigator(s)     | Cemal SOZENER, Craig WILLIAMSON, Darin ZAHURANEC, Devin BROWN, Eric ADELMAN, James BURKE, Lesli SKOLARUS, Lewis MORGENSTERN, Michael-Mei-Hwa WANG, Mollie MCDERMOTT, Natalie WHEELER, Phillip SCOTT, Richard SCHEER, Robert SILBERGLEIT, Venkatakrishna RAJAJEE, Will MEURER, William BARSAN                                             |
|                                            | Study Coordinator(s)   | Heidi ZAYAN, Karen FRISCH, Ron BALL, Sinan HANNA, Tina CHEN                                                                                                                                                                                                                                                                              |
|                                            | Nurse Champion(s)      | Kim SCHMIDT, Dee MIDDLETON                                                                                                                                                                                                                                                                                                               |

---

**Mt Sinai (17)**

| <b>Site</b>              | <b>Role</b>            | <b>Team Member</b>                                                                                                                                                                                                                                                                                        |
|--------------------------|------------------------|-----------------------------------------------------------------------------------------------------------------------------------------------------------------------------------------------------------------------------------------------------------------------------------------------------------|
| The Mount Sinai Hospital | Principal Investigator | Neha DANGAYACH, Stephan MAYER                                                                                                                                                                                                                                                                             |
|                          | Co-Investigator(s)     | Aaron TANSY, Alexandra REYNOLDS, Ali EXXATI, Anil RAMINENI, Cappi LAY, Clara BOYD, Errol GORDON, Gurmeen KAUR, Ivan MATOS DIAZ, Javaad AHMAD, John LIANG, Kaitlin REILLY, Kara SHEINART, Laura STEIN, Mandip DHAMOON, Moshe MIZRAHI, Pavis LAENGVEJKAL, Samson ZARBIV, Stanley TUHRIM, Sypridoula TSETSOU |
|                          | Study Coordinator(s)   | Chrisitine CRABTREE, Christy CHAN, Danielle WHEELWRIGHT, Glenna LEE, Pradhita MADDIREDDY, Ricardo RENVILL, Stephen GRIFFITHS, Ziya ZHANG                                                                                                                                                                  |
|                          | Nurse Champion(s)      | Mignon GUISHARD-POLE, Sonia NELSON                                                                                                                                                                                                                                                                        |

**UCLA (16)**      *Hub PI:* Sidney Starkman

| <b>Site</b>                        | <b>Role</b>            | <b>Team Member</b>                                                                                                                                                                                                                                                                                                                                                                                                                                       |
|------------------------------------|------------------------|----------------------------------------------------------------------------------------------------------------------------------------------------------------------------------------------------------------------------------------------------------------------------------------------------------------------------------------------------------------------------------------------------------------------------------------------------------|
| Ronald Regan UCLA Medical Center   | Principal Investigator | Sidney STARKMAN                                                                                                                                                                                                                                                                                                                                                                                                                                          |
|                                    | Co-Investigator(s)     | Adrian BURGOS, Allison ARCH, Anita TIPIRNENI, Arun CHHABRA, Chuan Frances FAN, David LIEBESKIND, Doojin KIM, Jason HINMAN, Jason TARPLEY, Jeffrey SAVER, Josephine HUANG, Konark MALHOTRA, Kunakorn ATCHANEEYASAKUL, Kyle KERN, Latisha SHARMA, Lindsey FRISCHMANN, Lucas RAMIREZ, May NOUR, Melissa REIDER-DEMERS, Mersedeh BAHRHOSSEINI, Michael MCMANUS, Nathan GAINES, Neal RAO, Neil MALUSTE, Parampreet SINGH, Paul VESPA, XianNan TANG, Zuolu LIU |
|                                    | Study Coordinator(s)   | Greg WONG, Ileana GRUNBERG, Janic CHUA, Judy GUZY, Julius WENG, Vivek SINGH                                                                                                                                                                                                                                                                                                                                                                              |
|                                    | Nurse Champion         | Regina OLIVAS                                                                                                                                                                                                                                                                                                                                                                                                                                            |
| Long Beach Memorial Medical Center | Principal Investigator | Nima RAMEXAN-ARAB                                                                                                                                                                                                                                                                                                                                                                                                                                        |
|                                    | Co-Investigator(s)     | Banafsheh YAFEH, Maged TANIOS, Michael THOMPSON, Nirav PATEL, Omid MOIDVAR                                                                                                                                                                                                                                                                                                                                                                               |
|                                    | Study Coordinator(s)   | Angie WEST, Caroline CALLEROS, Dena HOPKINS, Francoise TOUSSANT-JONES, Linda KERR, Marielou KEUTH, Rebecca RABENN, Roxana FLORES                                                                                                                                                                                                                                                                                                                         |
|                                    | Nurse Champion         | Angie WEST                                                                                                                                                                                                                                                                                                                                                                                                                                               |

**Mass General (15)**      *Hub PI:* Joshua Goldstein

| <b>Site</b>                    | <b>Role</b>            | <b>Team Member</b>                                                                                                                                                                                                                                                                                                                                                                                                                                                                  |
|--------------------------------|------------------------|-------------------------------------------------------------------------------------------------------------------------------------------------------------------------------------------------------------------------------------------------------------------------------------------------------------------------------------------------------------------------------------------------------------------------------------------------------------------------------------|
| Massachusetts General Hospital | Principal Investigator | Christopher ANDERSON                                                                                                                                                                                                                                                                                                                                                                                                                                                                |
|                                | Co-Investigator(s)     | Abbas KHARAL, Alvin DAS, Anand VENKATRAMAN, Ananda FINE, Andrea HARRIOTT, Andrea MOROTTI, Andreas CHARIDIMOU, Anne-Katrin GIESE, Arne LAUER, Ayaz KHAWAJA, Ayush BATRA, Brian EDLOW, Charlene ONG, Christina MIJALSKI, Daniel RUBIN, David CHUNG, David LERNER, David LIN, Doungporn RUTHIRAGO, Edilberto AMORIM, Eli ZIMMERMAN, Elif GOKCAL, Fadar OTITE, Faheem SHERIFF, Frieder SCHLUNK, Gregoire BOULOUIS, Guido FALCONE, Haitham ALABSI, Jennifer KIM, Jonathan ROSAND, Joshua |

GOLDSTEIN, Kelly SLOANE, Lee SCHWAMM, Li XIONG, Marc MALONEY, Marco PASI, Mark ETHERTON, Matthew BEVERS, Ming-Cheih DING, Minjee KIM, Natalia ROST, Navid VALIZADEH, Patricia MUSOLINO, Pedro PINTO, Rajan GADHIA, Ribal BASSIL, Richa SHARMA, Robert REGENHARDT, Saef IZZY, Sahar ZAFAR, Sameen JAFARI, Samuel SNIDER, Sandro MARINI, Sarah NELSON, Sarah WAHLSTER, Sergi RAMIREZ MARTINEZ, Shreyansh SHAH, Shyam RAO, Starane SHEPHERD, Thabele LESLIE-MAZWI, Xuemei CAI, Zachary THRELKELD

Study Coordinator(s) Abigail COHEN, Andrew WARREN, Brittany MILLS, Carissa TUOZZO, Caroline RIZZO, Casey COKKINIAS, Christopher FLYNN, Chun Mei SU, Devin QUALLS, Emily BENSON, Grace RILEY, Greg TIRRELL, Kristen MCNAMARA, Lauren BARTON, Melissa HOWELL, Panos FOTIADIS, Rebecca CLAPHAM, Ryan CALLAHAN, Sarah GRILL, Shane DONNELLY, Thomas GOMES, Zora DIPUCCHIO

Nurse Champion(s) Kathleen MARTIN, Kathryn HALL, Kathleen GRINKE, Vanessa MCKENNA

---

|                      |                                              |                                                                                                                                                                 |
|----------------------|----------------------------------------------|-----------------------------------------------------------------------------------------------------------------------------------------------------------------|
| Tufts Medical Center | Principal Investigator<br>Co-Investigator(s) | Joshua KORNBLUTH<br>Corey PENTO, David THALER, Deborah GREEN-LAROCHE, Janice MCLAUGHLIN, Julia BIANCO, Lester LEUNG, Shaylin KIRBY, Thomas SCANDURA, Xuemei CAI |
|                      | Study Coordinator(s)<br>Nurse Champion       | Haley HUGGINS, Lindsey SOLL, Michelle BETTLE, Sarah GANS<br>Corey PENTO                                                                                         |

---

**Northwestern (14)**

| <b>Site</b>                       | <b>Role</b>                                  | <b>Team Member</b>                                                                                                                                                        |
|-----------------------------------|----------------------------------------------|---------------------------------------------------------------------------------------------------------------------------------------------------------------------------|
| Northwestern<br>Memorial Hospital | Principal Investigator<br>Co-Investigator(s) | Shyam PRABHARKARAN<br>Arth SRIVASTAVA, Chen LIN, Fan CAPRIO, Ilana RUFF TREIBER, Jina YOUN, Linda JIANG, Philip CHANG, Rajbeer SANGHA, Richard BERNSTEIN, Scott MENDELSON |
|                                   | Study Coordinator(s)                         | Carlos CORADO, Erin WYMORE, Jillian LUX, Shannon STANFILL                                                                                                                 |

---

**UTSW (14)**

| <b>Site</b>                       | <b>Role</b>                                  | <b>Team Member</b>                                                                                                                                                                                                                   |
|-----------------------------------|----------------------------------------------|--------------------------------------------------------------------------------------------------------------------------------------------------------------------------------------------------------------------------------------|
| UT Southwestern<br>Medical Center | Principal Investigator<br>Co-Investigator(s) | Christiana HALL<br>Adam WILLIS, Bethany LUSSIER, Claudia PEREZ, DaiWai OLSON, Julian YANG, Junaid KALIA, Mark JOHNSON, Mohamed OSMAN, Narengia PIERRE-LOUIS, Shraddha MAINALI, Stephen FIGUEROA, Venkatesh AIYAGARI, Zakraus MAHDAVI |
|                                   | Study Coordinator(s)                         | Cecila HERNANDEZ, Christopher PALIOTTA, Deanna MYER, Jacob DENEY, Jenny BENITEZ, Katrina VAN DE                                                                                                                                      |

---



Nurse Champion(s) BRUINHORST, Maria MARTINEZ, Michelle  
 PROVENCHER, Pimen KURASHVILI, Sonja STUTZMAN,  
 Susie MADISON  
 DaiWai OLSON

---

**Baylor (11)**

| <b>Site</b>                                     | <b>Role</b>            | <b>Team Member</b>                                                                                                                                                                                                          |
|-------------------------------------------------|------------------------|-----------------------------------------------------------------------------------------------------------------------------------------------------------------------------------------------------------------------------|
| Baylor College of<br>Medicine Medical<br>Center | Principal Investigator | Chethan RAO, Jose SUAREZ                                                                                                                                                                                                    |
|                                                 | Co-Investigator(s)     | Alexandros GEORGIADIS, Benedict TAN, Bilal BUTT,<br>Christos LAZARIDIS, Eric BERSHAD, Kinjal DESAI,<br>Mohamed GAGOEH, Nelson MALDONADO, Pramod<br>GUPTA, Rahul DAMANI, Sanjeev SIVAKUMAR, Stelios<br>SMIRNAKIS, Syed KAZMI |
|                                                 | Study Coordinator(s)   | Emily JOBE, Eusebia CALVILLO                                                                                                                                                                                                |
|                                                 | Nurse Champion         | Perla LAWRENCE                                                                                                                                                                                                              |

---

**UCSF (11)** *Hub PI:* Claude Hemphill

| <b>Site</b>                       | <b>Role</b>            | <b>Team Member</b>                                                                                                                                                                                                    |
|-----------------------------------|------------------------|-----------------------------------------------------------------------------------------------------------------------------------------------------------------------------------------------------------------------|
| San Francisco<br>General Hospital | Principal Investigator | Claude HEMPHILL                                                                                                                                                                                                       |
|                                   | Co-Investigator(s)     | Cathra HALABI, Debbie YI MADHOK, Rene<br>COLORADO, Roger CHENG, Ahmad AHMAD, Anh<br>NGUYEN, Claude HEMPHILL, Elizabeth CAHILL, Natalie<br>CHENG, Neel SINGHAL, Nerissa KO, Nirav SHAH,<br>QingYand YUAN, Shahed TOOSI |
|                                   | Study Coordinator(s)   | Blakely ANDREWS                                                                                                                                                                                                       |
|                                   | Nurse Champion         | Christine MARTIN                                                                                                                                                                                                      |
| UCSF Medical<br>Center            | Principal Investigator | Wade SMITH                                                                                                                                                                                                            |
|                                   | Co-Investigator(s)     | Ahmad AHMAD, Anh NGUYEN, Claude HEMPHILL,<br>Elizabeth CAHILL, Natalie CHENG, Neel SINGHAL,<br>Nerissa KO, Nirav SHAH, QingYand YUAN, Shahed<br>TOOSI                                                                 |
|                                   | Study Coordinator(s)   | Dominica RANDAZZO, Jeany DUNCAN, Michel<br>MEEKER, Ryan MCCORMICK                                                                                                                                                     |

---

**Enrolled 1 – 9  
patients**

**Maryland (9)** *Hub PI:* Barney Stern

| <b>Site</b>                                 | <b>Role</b>            | <b>Team Member</b>                                                                                                              |
|---------------------------------------------|------------------------|---------------------------------------------------------------------------------------------------------------------------------|
| University of<br>Maryland Medical<br>Center | Principal Investigator | Marcella WOZNIAK                                                                                                                |
|                                             | Co-Investigator(s)     | Barney STERN, Bolanle FAMAKIN, Carolyn CRONIN,<br>Howard EISENBERG, John COLE, Melissa MOTTA,<br>Michael PHIPPS, Steven KITTNER |
|                                             | Study Coordinator(s)   | Amy ROACH, Charlene ALDRICH, Kaitlyn HENRY,<br>Virginia GANLEY                                                                  |
|                                             | Nurse Champion         | Joseph SUSCO                                                                                                                    |

---

**Iowa (9)**

| <b>Site</b>                                 | <b>Role</b>                                  | <b>Team Member</b>                                                                                                                                                                                                                                                                                         |
|---------------------------------------------|----------------------------------------------|------------------------------------------------------------------------------------------------------------------------------------------------------------------------------------------------------------------------------------------------------------------------------------------------------------|
| University of Iowa<br>Hospitals and Clinics | Principal Investigator<br>Co-Investigator(s) | Connie PIPER, Kaustubh LIMAYE<br>Ali SHEHARYAR, Allison VOSS, Edgar SAMANIEGO,<br>Emily JAKSICH, Enrique LEIRA, Harold ADAMS,<br>Hyungsub SHIM, Jeffrey MILLER, Laurie GUTMANN,<br>Nandakumar NAGARAJA, Salman AL JERDI, Sami AL<br>KASAB, Santiago ORTEGA-GUITERREZ, Sudeepta<br>DANDAPAT, Waldo GUERRERO |
|                                             | Study Coordinator(s)                         | Heena OLALDE, Jeri SIEREN, Nicole KRESSIN                                                                                                                                                                                                                                                                  |

**Arizona (8)**      *Hub PI:* Kurt Denninghoff

| <b>Site</b>                                            | <b>Role</b>                                                          | <b>Team Member</b>                                                                                                                                                                                                                                                                                                                                                                                                                                                                                                                                                                                                                                                            |
|--------------------------------------------------------|----------------------------------------------------------------------|-------------------------------------------------------------------------------------------------------------------------------------------------------------------------------------------------------------------------------------------------------------------------------------------------------------------------------------------------------------------------------------------------------------------------------------------------------------------------------------------------------------------------------------------------------------------------------------------------------------------------------------------------------------------------------|
| Banner University<br>Medical Center –<br>Tucson Campus | Principal Investigator<br>Co-Investigator(s)<br>Study Coordinator(s) | Kendra DRAKE<br>Chelsea KIDWELL, Kurt DENNINGHOFF<br>Adrienne SHIELDS, Alexia DEMITSAS, Andrew LAINE,<br>Auggie HERBER, Cyndra SCHEU, Derek GIN, Donald<br>DAVIDSON, Ealaf AL RABIA, Eddie SOTO, Elizabeth<br>CAMPBELL, Elizabeth SANGALANG, Eric MOORE, Eva<br>COLLINS , Gary KARTCHNER, Ginny STASINSKI ,<br>Isabelle CHEA, Jose CAMARENA, Karen LUTRICK,<br>Kathryn SCHIERLING, Kayla DARRIS, Kristen DEUPREE,<br>Lana BECWAR, Lisa SLAYTON - LOVELAND , Maria<br>GORDON, Mark RAMOS, Matt NELSO , Melisa VAN<br>SKIVER, Michelle NAOUR , Nahid MALEKNIAZI, Nancy<br>HORTON , Noraida BACANI, Ric NAAS, Sara KELLOGG,<br>Steve TRIPONEY, Timothy CARSWELL<br>Joan MACHAMER |
|                                                        | Nurse Champion                                                       |                                                                                                                                                                                                                                                                                                                                                                                                                                                                                                                                                                                                                                                                               |

|                                                       |                                                                      |                                                                                                                                                                                                                                                                                                                                                                                                                                                     |
|-------------------------------------------------------|----------------------------------------------------------------------|-----------------------------------------------------------------------------------------------------------------------------------------------------------------------------------------------------------------------------------------------------------------------------------------------------------------------------------------------------------------------------------------------------------------------------------------------------|
| Banner University<br>Medical Center –<br>South Campus | Principal Investigator<br>Co-Investigator(s)<br>Study Coordinator(s) | Kendra DRAKE<br>Kurt DENNINGHOFF<br>Adrienne SHIELDS, Andrew LAINE, Cyndra SCHEU,<br>Donald DAVIDSON, Elizabeth SANGALANG, Eric<br>MOORE, Eva COLLINS, Ginny STASINSKI, Isabelle<br>CHEA, Jose CAMARENA, Karen LUTRICK, Kathryn<br>SCHIERLING, Lana BECWAR, Lisa SLAYTON -<br>LOVELAND, Mark RAMOS, Matt NELSON, Melisa VAN<br>SKIVER, Michelle NAOUR, Nahid MALEKNIAZI, Nancy<br>HORTON, Noraida BACANI, Ric NAAS, Sara KELLOGG,<br>Steve TRIPONEY |
|-------------------------------------------------------|----------------------------------------------------------------------|-----------------------------------------------------------------------------------------------------------------------------------------------------------------------------------------------------------------------------------------------------------------------------------------------------------------------------------------------------------------------------------------------------------------------------------------------------|

**OHSU (8)**      *Hub PI:* Craig Warden

| <b>Site</b>                  | <b>Role</b>                                                          | <b>Team Member</b>                                                                                                                                                                                  |
|------------------------------|----------------------------------------------------------------------|-----------------------------------------------------------------------------------------------------------------------------------------------------------------------------------------------------|
| Harborview Medical<br>Center | Principal Investigator<br>Co-Investigator(s)<br>Study Coordinator(s) | Craig WARDEN, David TIRSCHWELL<br>Heemun KWOK, Vicki JOHNSON<br>Allison KUNZE, Glenn SCHUBERT, Lela PREWITT,<br>Patricia TANZI, Rizwan KALANI, Thomas-Cole<br>HILLIARD, Wendy HAUGEN, Wesley PLINKE |
|                              | Nurse Champion                                                       | Pat TANZI                                                                                                                                                                                           |

**MedStar (8)**

| <b>Site</b>                           | <b>Role</b>                               | <b>Team Member</b>                                                                                                                                                                                                                                |
|---------------------------------------|-------------------------------------------|---------------------------------------------------------------------------------------------------------------------------------------------------------------------------------------------------------------------------------------------------|
| MedStar Washington<br>Hospital Center | Principal Investigator                    | Richard BENSON                                                                                                                                                                                                                                    |
|                                       | Co-Investigator(s)                        | Alexis SIMPKINS, Amie HSIA, Amjad SHEHADAH, Apoorv PRASAD, Chandni KALARIA, Dennys REYES CANDEDO, John LYNCH, Leigh RICHARD, Nidhi GUPTA, Noorie PEDNEKAR, Saeed ALQAHTANI, Shahram MAJIDI, Syeda NAQVI, Tina BURTON, Claude NOGAY, Travis TAYLOR |
|                                       | Study Coordinator(s)<br>Nurse Champion(s) | Jamal SMITH, Juby MATHEWS, Leigh DEMONT, Preethy FEIT<br>Karen MORIARTY-POOLE, Shannon BURTON                                                                                                                                                     |

### Buffalo (6)

| <b>Site</b>                       | <b>Role</b>            | <b>Team Member</b>                                        |
|-----------------------------------|------------------------|-----------------------------------------------------------|
| Buffalo General<br>Medical Center | Principal Investigator | Marilou CHING                                             |
|                                   | Co-Investigator(s)     | Amit KANDEL, Christopher DELINE, Eugene GU, Robert SAWYER |
|                                   | Study Coordinator(s)   | Annemarie CRUMLISH, Dawn HOLLER, Navdeep LAIL             |

### Parkland (6)

| <b>Site</b>       | <b>Role</b>            | <b>Team Member</b>                                                                                                                                                                                                |
|-------------------|------------------------|-------------------------------------------------------------------------------------------------------------------------------------------------------------------------------------------------------------------|
| Parkland Hospital | Principal Investigator | Christiana HALL                                                                                                                                                                                                   |
|                   | Co-Investigator(s)     | Adam WILLIS, Bethany LUSSIER, Claudia PEREZ, DaiWai OLSON, Julian YANG, Junaid KALIA, Mark JOHNSON, Mohamed OSMAN, Narengia PIERRE-LOUIS, Shraddha MAINALI, Stephen FIGUEROA, Venkatesh AIYAGARI, Zakraus MAHDAVI |
|                   | Study Coordinator(s)   | Cecila HERNANDEZ, Christopher PALIOTTA, Deanna MYER, Jacob DENEY, Jenny BENITEZ, Katrina VAN DE BRUINHORST, Maria MARTINEZ, Michelle PROVENCHER, Pimen KURASHVILI, Sonja STUTZMAN, Susie MADISON                  |
|                   | Nurse Champion(s)      | Jennifer CROSS, Sondra PEREZ                                                                                                                                                                                      |

### Cornell (5)

| <b>Site</b>                         | <b>Role</b>            | <b>Team Member</b>                                                                                                                                                                                                                                                                                           |
|-------------------------------------|------------------------|--------------------------------------------------------------------------------------------------------------------------------------------------------------------------------------------------------------------------------------------------------------------------------------------------------------|
| NYP Weill Cornell<br>Medical Center | Principal Investigator | Halinder MANGAT                                                                                                                                                                                                                                                                                              |
|                                     | Co-Investigator(s)     | Adam GANZMAN, Alan SEGAL, Alexander MERKLER, Ali MAHTA, Aws ALAWI, Babak NAVI, Benjamin KUMMER, Dana LEIFER, Daniel LAHM, Dora JAMIESON, David ROH, Elie DANCOUR, Fawaz AL MUFTI, Hooman KAMEL, Jennifer SEVUSH, Jeremy RAGLAND, Michael LERARIO, Micheal REZNIK, Nicholas MORRIS, Shouri LAHIRI, Teresa MAY |
|                                     | Study Coordinator(s)   | Bagovest NIKOLOV, Dana ERGAS, Eric MORRIS, Erica EBER, Ryna MATHIAS                                                                                                                                                                                                                                          |
|                                     | Nurse Champion         | Joyce PHILIP                                                                                                                                                                                                                                                                                                 |

### OSF (5)

| <b>Site</b>                    | <b>Role</b>                                                          | <b>Team Member</b>                                                     |
|--------------------------------|----------------------------------------------------------------------|------------------------------------------------------------------------|
| OSF St. Francis Medical Center | Principal Investigator<br>Co-Investigator(s)<br>Study Coordinator(s) | Deepak NAIR<br>David WANG, Maureen MATHEWS,<br>Jill Arnold, Judi BECK, |

**Penn State (5)**

| <b>Site</b>                       | <b>Role</b>                                 | <b>Team Member</b>                    |
|-----------------------------------|---------------------------------------------|---------------------------------------|
| Penn State Hershey Medical Center | Principal Investigator<br>Study Coordinator | Kerstin BETTERMANN<br>Deborah HOFFMAN |

**Jackson Memorial (2)**

| <b>Site</b>               | <b>Role</b>                                                                                | <b>Team Member</b>                                                                                                                                                                                                                                                                                                         |
|---------------------------|--------------------------------------------------------------------------------------------|----------------------------------------------------------------------------------------------------------------------------------------------------------------------------------------------------------------------------------------------------------------------------------------------------------------------------|
| Jackson Memorial Hospital | Principal Investigator<br>Co-Investigator(s)<br><br>Study Coordinator(s)<br>Nurse Champion | Maranatha AYODELE<br>Amer MALIK, Erika MARULANDA-LONDONO, Gustavo ORTIZ, Jose ROMANO, Kristine O'PHELAN, Luis F. TORRES, Mohan KOTTAPALLY, Negar ASDAGHI, Nicole SUR, Nirav BHATT, Sebastian KOCH, Sushanth AROOR, Victor DEL BRUTTO, Zeeshan MEMON<br>Andrea ESCOBAR, Avi LANDMAN, Iszet, CAMPO-BUSTILLO<br>Violet KRAMER |

**St Thomas (1)**

| <b>Site</b>                | <b>Role</b>                                                                                | <b>Team Member</b>                                                                                                                |
|----------------------------|--------------------------------------------------------------------------------------------|-----------------------------------------------------------------------------------------------------------------------------------|
| Saint Thomas West Hospital | Principal Investigator<br>Co-Investigator(s)<br>Study Coordinator(s)<br><br>Nurse Champion | Frank LAFRANCHISE<br>James GLEMING<br>Alina SIMION, Deb PITTS, Diana COMAN, Kim OWENS,<br>Mitzi BAKER, Nirali SHAH<br>Diana COMAN |

**Vanderbilt (1)**

| <b>Site</b>                    | <b>Role</b>                                                                                | <b>Team Member</b>                                                                                                                             |
|--------------------------------|--------------------------------------------------------------------------------------------|------------------------------------------------------------------------------------------------------------------------------------------------|
| Vanderbilt University Hospital | Principal Investigator<br>Co-Investigator(s)<br>Study Coordinator(s)<br><br>Nurse Champion | Howard KIRSHNER<br>Lisa HERMANN, Mark BAKER, Michael FROEHLER<br>Andrea REED, Drew ANDERSON, Jessica MARLIN,<br>Matthew WARRICK<br>Diane BROWN |

**eTable 1.** Additional baseline and treatment information of the patients

| <b>Characteristic</b>                                                                                     | <b>Intensive<br/>N=581</b> | <b>Standard<br/>N=570</b> |
|-----------------------------------------------------------------------------------------------------------|----------------------------|---------------------------|
| Stroke onset to hospital arrival(h) – median (IQR)                                                        | 2.7 (1.1-4.8)              | 2.9 (1.2-5.0)             |
| Hospital arrival to randomization(h) - median (IQR)                                                       | 3.6 (2.5-5.2)              | 3.5 (2.4-5.1)             |
| Stroke onset to randomization (h) - median (IQR)                                                          | 7.1 (4.8-9.4)              | 7.1 (4.9-9.7)             |
| Randomization to study treatment initiation(h) – median (interquartile range)                             | 1.5 (1.1-2.2)              | 1.3 (0.9-2.0)             |
| Time on treatment (h) - median (IQR)                                                                      | 71.9 (43.1-72.0)           | 72.0 (54.0-72.0)          |
| Study treatment completed* – no. (%)                                                                      | 433 (74.5)                 | 510 (89.5)                |
| ≥68 hours of study treatment <sup>^</sup>                                                                 | 308 (71.1)                 | 374 (73.3)                |
| Discharged prior to 68 hours                                                                              | 111 (25.6)                 | 126 (24.7)                |
| Withdrawal of care/death                                                                                  | 14 (3.2)                   | 10 (2.0)                  |
| Study treatment not started – no. (%)                                                                     | 4 (0.7)                    | 5 (0.9)                   |
| Reported reasons for study treatment started but not completed – no. (%)                                  | 144 (24.8)                 | 55 (9.6)                  |
| Patient/Legally authorized representative requests to continue study without study treatment <sup>^</sup> | 43 (29.9)                  | 11 (20.0)                 |
| Glucose <70 mg/dL x3 within 24hrs <sup>***^</sup>                                                         | 48 (33.3)                  | 2 (3.6)                   |
| Glucose < 40 mg/dL <sup>^</sup>                                                                           | 7 (4.9)                    | 0                         |
| Other adverse event/serious adverse event <sup>***</sup>                                                  | 10 (6.9)                   | 16 (29.1)                 |
| Withdrawal of informed consent                                                                            | 3 (2.1)                    | 1 (1.8)                   |
| Other <sup>****</sup>                                                                                     | 33 (22.9)                  | 25 (45.5)                 |

\*Study treatment completed is defined as at least 68 hours of the 72 hour study treatment or hospital discharge or withdrawal of care/death prior to study treatment completion.

\*\*Stopped study treatment per protocol.

<sup>^</sup>There were a total of 15 patients with glucose values < 40mg/dL. Of the 15, 7 stopped study treatment due to one glucose < 40 mg/dL; 4 stopped early due to 3 glucose <70 mg/dL within 24hrs including at least one <40 mg/dL; 1 Patient/Legally authorized representative requested to continue study without study treatment and had a glucose value below 40mg/dL. The remaining 3 had one glucose value <40 mg/dL yet completed study treatment.

<sup>\*\*\*</sup>Other AEs in the intensive group were: 4 patients with <3 glucose values between 40-70 mg/dL; 5 patients had multiple AEs/SAEs; 1 patient from study treatment due to safety concerns. Other AEs in the standard group were: 7 patients had multiple AEs/SAEs; 1 patient was identified as a type 1 diabetic; 8 patients were hyperglycemic.

<sup>\*\*\*\*</sup>Other reasons included change of diagnosis, hospital unit transfer and lack of IV access.

**eTable 2.** Secondary analyses of primary and secondary outcomes

| <b>a. Per Protocol<sup>¶</sup> Analysis</b>   |                            |                           |                                                    |                                                      |                                         |                            |
|-----------------------------------------------|----------------------------|---------------------------|----------------------------------------------------|------------------------------------------------------|-----------------------------------------|----------------------------|
|                                               | <b>Intensive<br/>N=530</b> | <b>Standard<br/>N=518</b> | <b>Unadjusted<br/>Risk Difference<br/>(95% CI)</b> | <b>Unadjusted<br/>Relative<br/>Risk<br/>(95% CI)</b> | <b>Adjusted<br/>Relative<br/>Risk**</b> | <b>P<br/>Value<br/>***</b> |
| <b>Primary Efficacy Outcome at 90 days</b>    |                            |                           |                                                    |                                                      |                                         |                            |
| Favorable * modified Rankin Scale - n (%)     | 107 (20.2)                 | 105 (20.3)                | -0.08%<br>(-4.95%, 4.78%)                          | 1.00<br>(0.78, 1.27)                                 | 0.98<br>(0.87, 1.10)                    | 0.73                       |
| <b>Secondary Efficacy Outcomes at 90 days</b> |                            |                           |                                                    |                                                      |                                         |                            |
| Favorable NIHSS (0 or 1) – n/N (%)            | 138/325<br>(42.5)          | 147/344<br>(42.7)         | -0.27%<br>(-7.77%, 7.23%)                          | 0.99<br>(0.83, 1.18)                                 | 1.00<br>(0.93, 1.09)                    | 0.94                       |
| Favorable Barthel Index (95-100) – n/N (%)    | 251/461<br>(54.5)          | 237/443<br>(53.5)         | 0.95%<br>(-5.55%, 7.45%)                           | 1.02<br>(0.90, 1.15)                                 | 1.00<br>(0.95, 1.05)                    | 0.78                       |
| SSQOL – n, Median (IQR)                       | 417, 3.73<br>(2.89,4.39)   | 401, 3.67<br>(3.01,4.43)  | 0.06<br>(-0.13, 0.25)                              | -                                                    | -                                       | 0.69                       |
| Severe Hypoglycemia (<40mg/dL) - n (%)        | 14 (2.6)                   | 0                         | 2.64%<br>(1.28%, 4.01%)                            | -                                                    | -                                       | 0.0001                     |
| Death- n (%)                                  | 54 (10.2)                  | 64 (12.4)                 | -2.17%<br>(-6.00%, 1.66%)                          | 0.82<br>(0.59, 1.16)                                 | -                                       | 0.27                       |

<sup>¶</sup> Per Protocol is defined as all randomized patients that started treatment, had the 90 day primary outcome, had a final diagnosis of ischemic stroke or TIA, and did not have an eligibility violation.

\*Favorable for the primary efficacy outcome is defined as modified Rankin Scale (mRS) score of 0 in patients with mild stroke (baseline NIHSS 3-7), mRS 0 or 1 in patients with moderate stroke (baseline NIHSS 8-14), and mRS 0, 1 or 2 in patients with severe stroke (baseline NIHSS 15-22) at 90 (-14/+30) days.

\*\* The adjusted analyses were adjusted for baseline stroke severity (NIHSS 3-7 (mild); 8-14 (moderate); 15-22 (severe)) and thrombolysis / thrombectomy use (yes/no).

\*\*\*P values were generated based on the following statistical tests: Wald test for the adjusted analysis of the primary; a chi-square test for the unadjusted binary secondary efficacy and death outcome; Fisher's exact test for the unadjusted binary severe hypoglycemia outcome; a Wilcoxon rank sum test for the unadjusted comparison of SSQOL with reported median and interquartile range (IQR).

| <b>b.Primary Analysis when Site is included as a random effect</b> |                   |                   |                                                    |                                                      |                                         |                            |
|--------------------------------------------------------------------|-------------------|-------------------|----------------------------------------------------|------------------------------------------------------|-----------------------------------------|----------------------------|
|                                                                    | <b>Intensive</b>  | <b>Standard</b>   | <b>Unadjusted<br/>Risk Difference<br/>(95% CI)</b> | <b>Unadjusted<br/>Relative<br/>Risk<br/>(95% CI)</b> | <b>Adjusted<br/>Relative<br/>Risk**</b> | <b>P<br/>Value<br/>***</b> |
| <b>Primary Efficacy Outcome at 90 days</b>                         |                   |                   |                                                    |                                                      |                                         |                            |
| Primary Analysis                                                   | 119/581<br>(20.5) | 123/570<br>(21.6) | -0.83%<br>(-5.72%, 4.06%)                          | 0.96<br>(0.77, 1.20)                                 | 0.93<br>(0.75, 1.16)                    | 0.53                       |
| Per Protocol Analysis                                              | 107/530<br>(20.2) | 105/518<br>(20.3) | -0.08%<br>(-4.95%, 4.78%)                          | 1.00<br>(0.78, 1.27)                                 | 0.96<br>(0.76,1.21)                     | 0.74                       |

**eTable 3.** Baseline characteristics and treatment information by highest enrolling sites vs all other sites by treatment group

| Characteristic                                       | Six Highest Enrolling Sites<br>(>45 enrolled per site) |                     | All Other Sites      |                     |
|------------------------------------------------------|--------------------------------------------------------|---------------------|----------------------|---------------------|
|                                                      | Intensive<br>(N=243)                                   | Standard<br>(N=242) | Intensive<br>(N=338) | Standard<br>(N=328) |
| Age (yr) - median (IQR)                              | 65 (57-74)                                             | 66 (56-74)          | 67 (57-76)           | 65.5 (57-77)        |
| Sex- no. (%)                                         |                                                        |                     |                      |                     |
| Male                                                 | 130 (53.5)                                             | 118 (48.8)          | 191 (56.5)           | 188 (57.3)          |
| Female                                               | 113 (46.5)                                             | 124 (51.2)          | 147 (43.5)           | 140 (42.7)          |
| Race - n/N (%)                                       |                                                        |                     |                      |                     |
| White                                                | 147/235 (62.6)                                         | 154/232 (66.4)      | 219/325 (67.4)       | 214/315 (67.9)      |
| Black                                                | 85/235 (36.2)                                          | 73/232 (31.5)       | 95/325 (29.2)        | 81/315 (25.7)       |
| Asian                                                | 3/235 (1.3)                                            | 4/232 (1.7)         | 9/325 (2.8)          | 14/315 (4.4)        |
| Other*                                               | 0/235 (0)                                              | 1/232 (0.4)         | 2/325 (0.6)          | 6/315 (1.9)         |
| Hispanic Ethnicity - n/N (%)                         | 35/239 (14.6)                                          | 48/234 (20.5)       | 52/308 (16.9)        | 43/306 (14.1)       |
| Final diagnosis - no. (%)                            |                                                        |                     |                      |                     |
| Ischemic stroke                                      | 222 (91.4)                                             | 223 (92.1)          | 320 (94.7)           | 301 (91.8)          |
| TIA                                                  | 4 (1.6)                                                | 2 (0.8)             | 4 (1.2)              | 10 (3.0)            |
| Other                                                | 17 (7.0)                                               | 17 (7.0)            | 14 (4.1)             | 17 (5.2)            |
| Thrombolysis or Thrombectomy** - no. (%)             |                                                        |                     |                      |                     |
| Intravenous tPA                                      | 150 (61.7)                                             | 150 (62)            | 222 (65.7)           | 203 (61.9)          |
| Mechanical treatment                                 | 36 (14.8)                                              | 31 (12.8)           | 38 (11.2)            | 41 (12.5)           |
| Intraarterial drug therapy                           | 8 (3.3)                                                | 6 (2.5)             | 6 (1.8)              | 15 (4.6)            |
| Medical History - no. (%)                            |                                                        |                     |                      |                     |
| Hypertension                                         | 212 (87.2)                                             | 214 (88.4)          | 301 (89.1)           | 288 (87.8)          |
| Diabetes mellitus (Type II)                          | 201 (82.7)                                             | 187 (77.3)          | 267 (79.0)           | 268 (81.7)          |
| Hyperlipidemia                                       | 141 (58.0)                                             | 124 (51.2)          | 209 (61.8)           | 203 (61.9)          |
| Coronary artery disease                              | 69 (28.4)                                              | 75 (31.0)           | 90 (26.6)            | 92 (28.0)           |
| Atrial fibrillation                                  | 49 (20.2)                                              | 40 (16.5)           | 75 (22.2)            | 66 (20.1)           |
| Previous Ischemic stroke                             | 48 (19.8)                                              | 38 (15.7)           | 56 (16.6)            | 61 (18.6)           |
| Previous large vessel atherosclerosis                | 15 (6.2)                                               | 14 (5.8)            | 27 (8.0)             | 25 (7.6)            |
| Eligibility POC Blood Glucose (mg/dL) - median (IQR) | 186.5 (154-250)                                        | 188.5 (153-242)     | 188 (153-252)        | 183 (156-253)       |
| Baseline NIHSS at randomization - median (IQR)       | 8 (4-12)                                               | 8 (5-14)            | 7 (5-13)             | 7 (5-12)            |
| NIHSS baseline category at randomization – no. (%)   |                                                        |                     |                      |                     |
| NIHSS 3-7                                            | 119 (49.0)                                             | 114 (47.1)          | 172 (50.9)           | 177 (54.0)          |
| NIHSS 8-14                                           | 78 (32.1)                                              | 70 (28.9)           | 99 (29.3)            | 88 (26.8)           |
| NIHSS 15-22                                          | 46 (18.9)                                              | 58 (24.0)           | 67 (19.8)            | 63 (19.2)           |
| Favorable primary efficacy outcome – n/N (%)         | 56/238 (23.5)                                          | 56/234(24.0)        | 63/320 (20.0)        | 67/318 (21.1)       |

IQR – interquartile range; tPA – tissue plasminogen activator; POC – Point of Care; NIHSS – National Institutes of Health Stroke Scale; the NIHSS ranges from 0 to 42, with higher scores indicating greater neurological deficits.

\*Other includes American Indian or Alaska Native and Native Hawaiian or Other Pacific Islander.

\*\*Some patients received more than one type of thrombolysis or thrombectomy.

**eFigure 1.** Primary efficacy outcome, according to subgroups

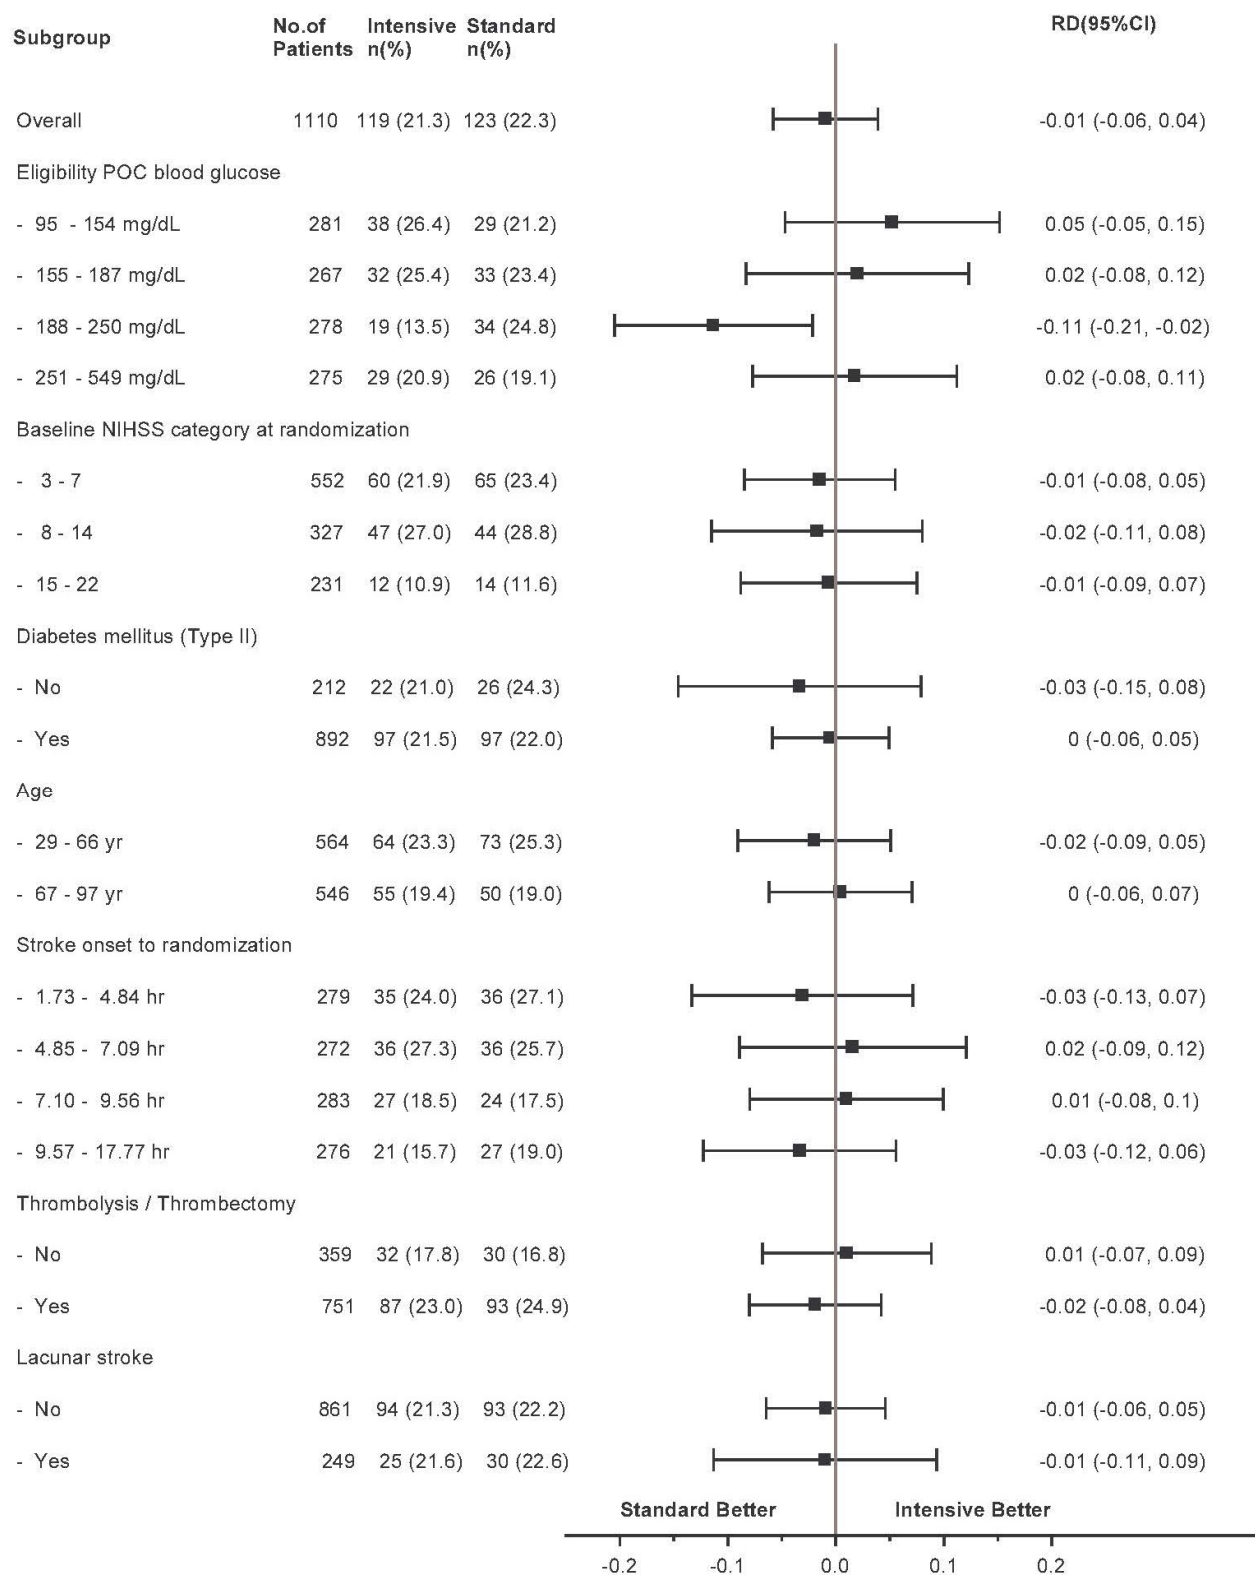



**eFigure 2.** Relative risk and 95% confidence intervals for reported serious adverse events. Listed by number of patients with at least one event

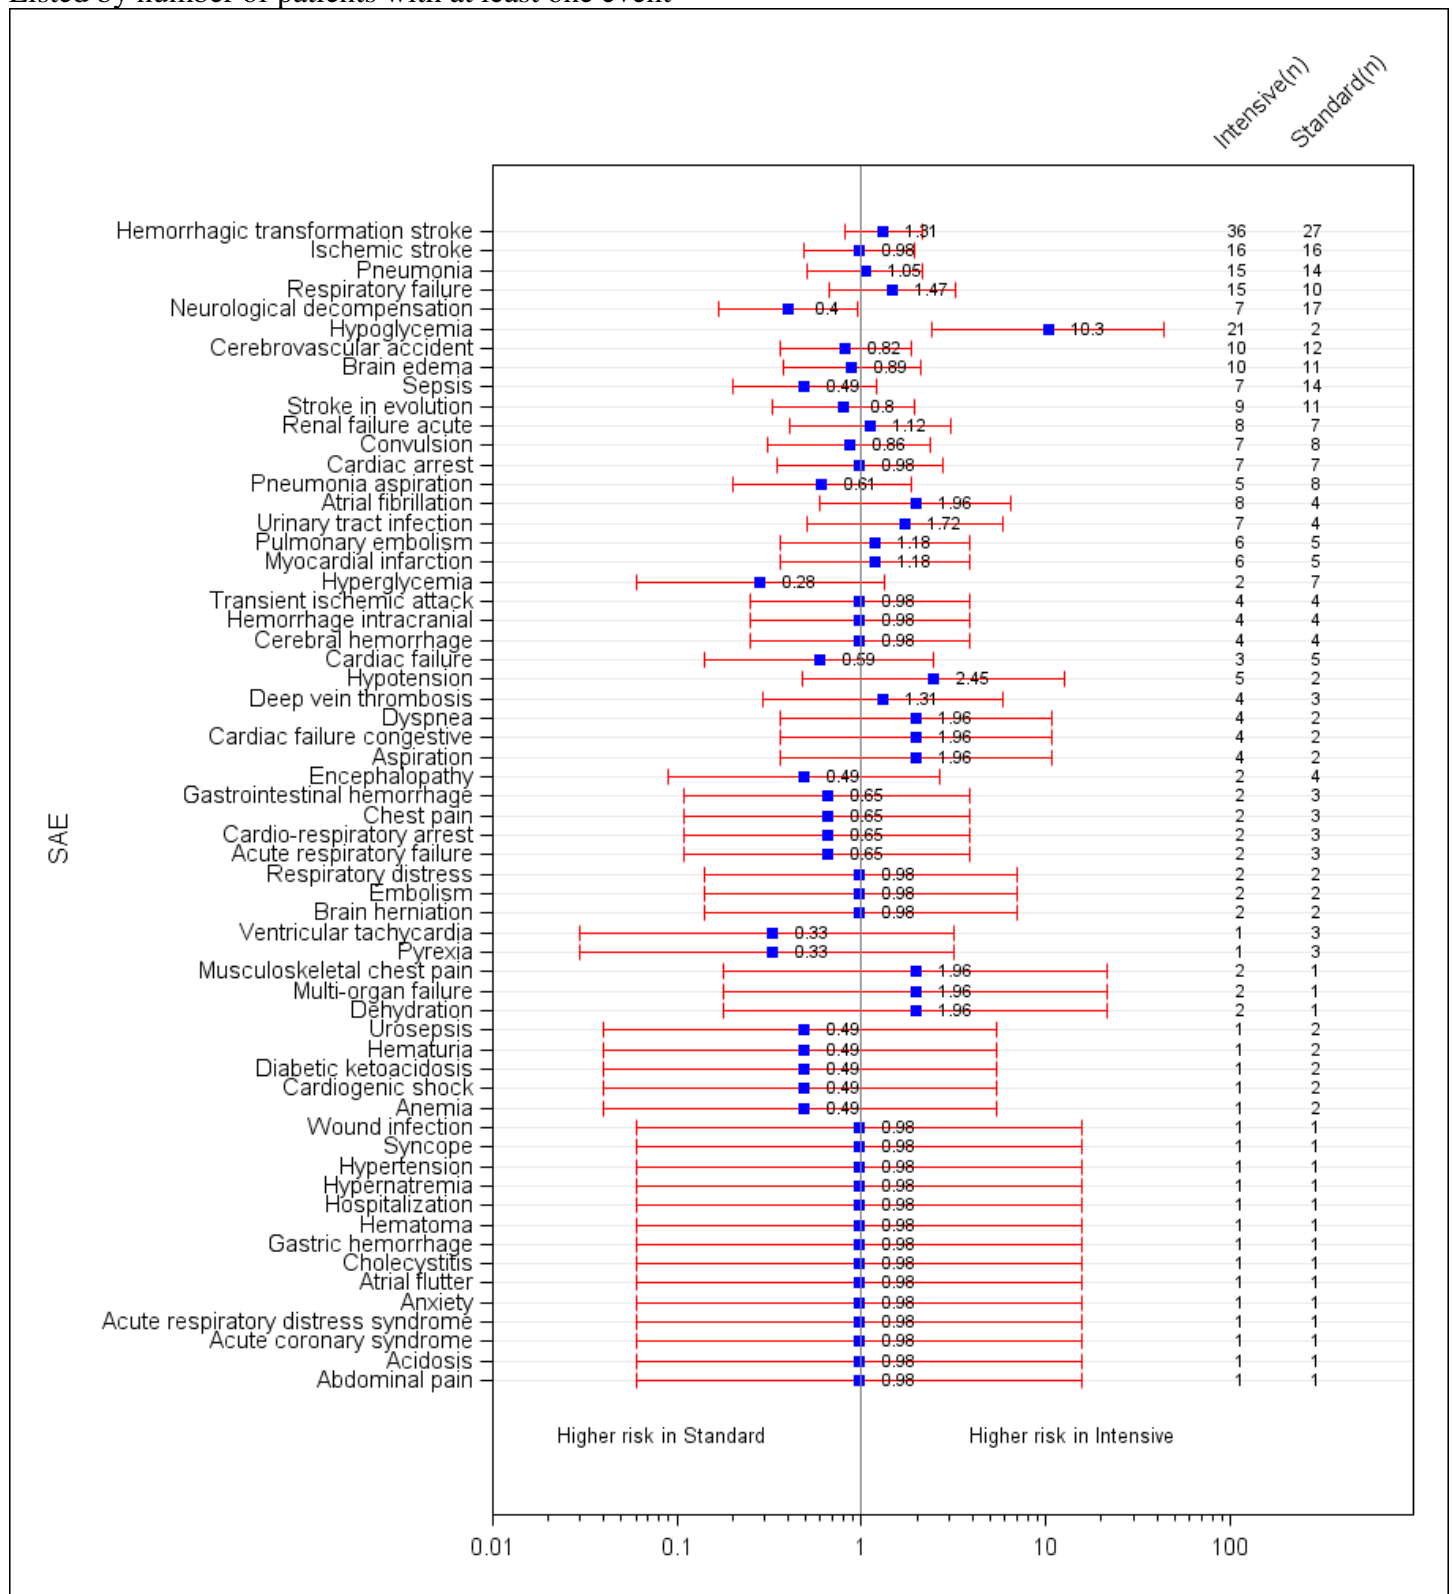

Supplement: jama-e199346-s003.pdf [file jama-e199346-s003.pdf]
