# Supplementary material
Source: PubMed Central journal article supplement (PMC6652154)
Supplement: jama-e199346-s004.pdf [file jama-e199346-s004.pdf]

# Data Sharing Statement

Johnston. Intensive vs Standard Treatment of Hyperglycemia and Functional Outcome in Patients With Acute Ischemic Stroke. *JAMA*. Published July 23, 2019. 10.1001/jama.2019.9346

## Data

**Data available:** Yes

**Data types:** Deidentified participant data, Data dictionary, Other (please specify)

**Additional Information:** Protocol, annotated case report form.

**How to access data:** The study team will make available de-identified data files to the public via the NIH data repository. The datasets and related information (protocol, annotated case report forms and data dictionary) will be submitted to the National Institute of Neurological Diseases and Stroke (NINDS) for their placement within NINDS's archived clinical research datasets. Further information on the request process can be found at: <https://www.ninds.nih.gov/Current-Research/Research-Funded-NINDS/Clinical-Research/Archived-Clinical-Research-Datasets>.

**When available:** beginning date: 05-31-2019

## Supporting Documents

**Document types:** Statistical/analytic code available on request.

**How to access documents:** Supplement 2

**When available:** With publication

## Additional Information

**Who can access the data:** Requesting researchers

**Types of analyses:** Research analysis per requesting researcher

**Mechanisms of data availability:** Requesting process can be found at: <https://www.ninds.nih.gov/Current-Research/Research-Funded-NINDS/Clinical-Research/Archived-Clinical-Research-Datasets>
